# Supplementary material for: <em>Adlercreutzia equolifaciens</em> Is an Anti-inflammatory Commensal Bacterium with Decreased Abundance in Gut Microbiota of Patients with Metabolic Liver Disease
Source: Preprints.org preprint supplement (doi:10.20944/preprints202305.2093.v1), 2023-05-30
Supplement: Supplementary file 1 [file Supplementary Table 1.xlsx]

## Sheet: Cohort Fig2
bioproject	project_alias	sample_accession	country	fibrosis_stage	num_reads_subsampled	ae_seq_coverage	excluded	excluded_reason
PRJNA373901	Loomba2017	SRS1993527	USA	Mild/Moderate	5M*2 paired-end	0	FALSE	NA
PRJNA373901	Loomba2017	SRS1993528	USA	Mild/Moderate	5M*2 paired-end	0	FALSE	NA
PRJNA373901	Loomba2017	SRS1993531	USA	Mild/Moderate	5M*2 paired-end	0.0628882	FALSE	NA
PRJNA373901	Loomba2017	SRS1993533	USA	Mild/Moderate	5M*2 paired-end	0.0133225	FALSE	NA
PRJNA373901	Loomba2017	SRS1993535	USA	Mild/Moderate	5M*2 paired-end	0	FALSE	NA
PRJNA373901	Loomba2017	SRS1993536	USA	Mild/Moderate	5M*2 paired-end	0	FALSE	NA
PRJNA373901	Loomba2017	SRS1993537	USA	Mild/Moderate	5M*2 paired-end	0.0555392	FALSE	NA
PRJNA373901	Loomba2017	SRS1993539	USA	Mild/Moderate	5M*2 paired-end	0.0179436	FALSE	NA
PRJNA373901	Loomba2017	SRS1993542	USA	Mild/Moderate	5M*2 paired-end	0.0127355	FALSE	NA
PRJNA373901	Loomba2017	SRS1993544	USA	Mild/Moderate	5M*2 paired-end	0	FALSE	NA
PRJNA373901	Loomba2017	SRS1993547	USA	Mild/Moderate	5M*2 paired-end	0.0232062	FALSE	NA
PRJNA373901	Loomba2017	SRS1993550	USA	Mild/Moderate	5M*2 paired-end	0	FALSE	NA
PRJNA373901	Loomba2017	SRS1993557	USA	Mild/Moderate	5M*2 paired-end	0.0109825	FALSE	NA
PRJNA373901	Loomba2017	SRS1993561	USA	Mild/Moderate	5M*2 paired-end	0	FALSE	NA
PRJNA373901	Loomba2017	SRS1993562	USA	Mild/Moderate	5M*2 paired-end	0	FALSE	NA
PRJNA373901	Loomba2017	SRS1993566	USA	Mild/Moderate	5M*2 paired-end	0	FALSE	NA
PRJNA373901	Loomba2017	SRS1993567	USA	Mild/Moderate	5M*2 paired-end	0.0498556	FALSE	NA
PRJNA373901	Loomba2017	SRS1993573	USA	Mild/Moderate	5M*2 paired-end	0.0473938	FALSE	NA
PRJNA373901	Loomba2017	SRS1993572	USA	Mild/Moderate	5M*2 paired-end	0.0465702	FALSE	NA
PRJNA373901	Loomba2017	SRS1993574	USA	Mild/Moderate	5M*2 paired-end	0.03054	FALSE	NA
PRJNA373901	Loomba2017	SRS1993575	USA	Mild/Moderate	5M*2 paired-end	0.0772117	FALSE	NA
PRJNA373901	Loomba2017	SRS1993576	USA	Mild/Moderate	5M*2 paired-end	0.101053	FALSE	NA
PRJNA373901	Loomba2017	SRS1993584	USA	Mild/Moderate	5M*2 paired-end	0	FALSE	NA
PRJNA373901	Loomba2017	SRS1994011	USA	Mild/Moderate	5M*2 paired-end	0.0230557	FALSE	NA
PRJNA373901	Loomba2017	SRS1994010	USA	Mild/Moderate	5M*2 paired-end	0.0140664	FALSE	NA
PRJNA373901	Loomba2017	SRS1994014	USA	Mild/Moderate	5M*2 paired-end	0.090112	FALSE	NA
PRJNA373901	Loomba2017	SRS1994015	USA	Mild/Moderate	5M*2 paired-end	0	FALSE	NA
PRJNA373901	Loomba2017	SRS1994018	USA	Mild/Moderate	5M*2 paired-end	0	FALSE	NA
PRJNA373901	Loomba2017	SRS1994023	USA	Mild/Moderate	5M*2 paired-end	0	FALSE	NA
PRJNA373901	Loomba2017	SRS1994024	USA	Mild/Moderate	5M*2 paired-end	0.69471	FALSE	NA
PRJNA373901	Loomba2017	SRS1994025	USA	Mild/Moderate	5M*2 paired-end	0	FALSE	NA
PRJNA373901	Loomba2017	SRS1994022	USA	Mild/Moderate	5M*2 paired-end	0	FALSE	NA
PRJNA373901	Loomba2017	SRS1994026	USA	Mild/Moderate	5M*2 paired-end	0	FALSE	NA
PRJNA373901	Loomba2017	SRS1994027	USA	Mild/Moderate	5M*2 paired-end	0	FALSE	NA
PRJNA373901	Loomba2017	SRS1994030	USA	Mild/Moderate	5M*2 paired-end	0	FALSE	NA
PRJNA373901	Loomba2017	SRS1994032	USA	Mild/Moderate	5M*2 paired-end	0	FALSE	NA
PRJNA373901	Loomba2017	SRS1993526	USA	Mild/Moderate	5M*2 paired-end	0	FALSE	NA
PRJNA373901	Loomba2017	SRS1993530	USA	Mild/Moderate	5M*2 paired-end	0	FALSE	NA
PRJNA373901	Loomba2017	SRS1993532	USA	Mild/Moderate	5M*2 paired-end	0	FALSE	NA
PRJNA373901	Loomba2017	SRS1993534	USA	Mild/Moderate	5M*2 paired-end	0.0327793	FALSE	NA
PRJNA373901	Loomba2017	SRS1993538	USA	Mild/Moderate	5M*2 paired-end	0.0168566	FALSE	NA
PRJNA373901	Loomba2017	SRS1993540	USA	Mild/Moderate	5M*2 paired-end	0.0196835	FALSE	NA
PRJNA373901	Loomba2017	SRS1993541	USA	Mild/Moderate	5M*2 paired-end	0	FALSE	NA
PRJNA373901	Loomba2017	SRS1993543	USA	Mild/Moderate	5M*2 paired-end	0.0241539	FALSE	NA
PRJNA373901	Loomba2017	SRS1993545	USA	Mild/Moderate	5M*2 paired-end	0	FALSE	NA
PRJNA373901	Loomba2017	SRS1993552	USA	Mild/Moderate	5M*2 paired-end	0.0249885	FALSE	NA
PRJNA373901	Loomba2017	SRS1993551	USA	Mild/Moderate	5M*2 paired-end	0	FALSE	NA
PRJNA373901	Loomba2017	SRS1993555	USA	Mild/Moderate	5M*2 paired-end	0	FALSE	NA
PRJNA373901	Loomba2017	SRS1993556	USA	Mild/Moderate	5M*2 paired-end	0	FALSE	NA
PRJNA373901	Loomba2017	SRS1993559	USA	Mild/Moderate	5M*2 paired-end	0.0279204	FALSE	NA
PRJNA373901	Loomba2017	SRS1993560	USA	Mild/Moderate	5M*2 paired-end	0	FALSE	NA
PRJNA373901	Loomba2017	SRS1993564	USA	Mild/Moderate	5M*2 paired-end	0.0171548	FALSE	NA
PRJNA373901	Loomba2017	SRS1993568	USA	Mild/Moderate	5M*2 paired-end	0.0454021	FALSE	NA
PRJNA373901	Loomba2017	SRS1993569	USA	Mild/Moderate	5M*2 paired-end	0.103257	FALSE	NA
PRJNA373901	Loomba2017	SRS1993570	USA	Mild/Moderate	5M*2 paired-end	0	FALSE	NA
PRJNA373901	Loomba2017	SRS1993580	USA	Mild/Moderate	5M*2 paired-end	0	FALSE	NA
PRJNA373901	Loomba2017	SRS1993581	USA	Mild/Moderate	5M*2 paired-end	0	FALSE	NA
PRJNA373901	Loomba2017	SRS1993587	USA	Mild/Moderate	5M*2 paired-end	0	FALSE	NA
PRJNA373901	Loomba2017	SRS1993589	USA	Mild/Moderate	5M*2 paired-end	0	FALSE	NA
PRJNA373901	Loomba2017	SRS1993590	USA	Mild/Moderate	5M*2 paired-end	0	FALSE	NA
PRJNA373901	Loomba2017	SRS1993591	USA	Mild/Moderate	5M*2 paired-end	0.0167784	FALSE	NA
PRJNA373901	Loomba2017	SRS1994017	USA	Mild/Moderate	5M*2 paired-end	0	TRUE	too few reads (<10M)
PRJNA373901	Loomba2017	SRS1994029	USA	Mild/Moderate	5M*2 paired-end	0.367495	FALSE	NA
PRJNA373901	Loomba2017	SRS1993529	USA	Mild/Moderate	5M*2 paired-end	0.0148013	FALSE	NA
PRJNA373901	Loomba2017	SRS1993549	USA	Mild/Moderate	5M*2 paired-end	0	FALSE	NA
PRJNA373901	Loomba2017	SRS1993553	USA	Mild/Moderate	5M*2 paired-end	0	FALSE	NA
PRJNA373901	Loomba2017	SRS1993554	USA	Mild/Moderate	5M*2 paired-end	0	FALSE	NA
PRJNA373901	Loomba2017	SRS1993578	USA	Mild/Moderate	5M*2 paired-end	0.0169967	FALSE	NA
PRJNA373901	Loomba2017	SRS1993582	USA	Mild/Moderate	5M*2 paired-end	0.0525036	FALSE	NA
PRJNA373901	Loomba2017	SRS1993586	USA	Mild/Moderate	5M*2 paired-end	0	FALSE	NA
PRJNA373901	Loomba2017	SRS1994013	USA	Mild/Moderate	5M*2 paired-end	0	FALSE	NA
PRJNA373901	Loomba2017	SRS1994020	USA	Mild/Moderate	5M*2 paired-end	0	FALSE	NA
PRJNA373901	Loomba2017	SRS1993558	USA	Advanced	5M*2 paired-end	0	FALSE	NA
PRJNA373901	Loomba2017	SRS1993563	USA	Advanced	5M*2 paired-end	0	FALSE	NA
PRJNA373901	Loomba2017	SRS1993571	USA	Advanced	5M*2 paired-end	0.131089	FALSE	NA
PRJNA373901	Loomba2017	SRS1994016	USA	Advanced	5M*2 paired-end	0	FALSE	NA
PRJNA373901	Loomba2017	SRS1994019	USA	Advanced	5M*2 paired-end	0	FALSE	NA
PRJNA373901	Loomba2017	SRS1993546	USA	Advanced	5M*2 paired-end	0	FALSE	NA
PRJNA373901	Loomba2017	SRS1993548	USA	Advanced	5M*2 paired-end	0	FALSE	NA
PRJNA373901	Loomba2017	SRS1993565	USA	Advanced	5M*2 paired-end	0	FALSE	NA
PRJNA373901	Loomba2017	SRS1993577	USA	Advanced	5M*2 paired-end	0	FALSE	NA
PRJNA373901	Loomba2017	SRS1993583	USA	Advanced	5M*2 paired-end	0	FALSE	NA
PRJNA373901	Loomba2017	SRS1993585	USA	Advanced	5M*2 paired-end	0	FALSE	NA
PRJNA373901	Loomba2017	SRS1993588	USA	Advanced	5M*2 paired-end	0	FALSE	NA
PRJNA373901	Loomba2017	SRS1994021	USA	Advanced	5M*2 paired-end	0	FALSE	NA
PRJNA373901	Loomba2017	SRS1994028	USA	Advanced	5M*2 paired-end	0	FALSE	NA

## Sheet: Cohort Fig3
bioproject	project_alias	sample_accession	country	group	num_reads_subsampled	ae_seq_coverage	excluded	excluded_reason
PRJEB6337	QinNan2014	ERS475105	China	Healthy	5M*2 paired-end	0	FALSE	NA
PRJEB6337	QinNan2014	ERS475106	China	Healthy	5M*2 paired-end	0	FALSE	NA
PRJEB6337	QinNan2014	ERS475107	China	Healthy	5M*2 paired-end	0.0849513	FALSE	NA
PRJEB6337	QinNan2014	ERS475108	China	Healthy	5M*2 paired-end	0.0647526	FALSE	NA
PRJEB6337	QinNan2014	ERS475109_ERS475110	China	Healthy	5M*2 paired-end	0	FALSE	NA
PRJEB6337	QinNan2014	ERS475111	China	Healthy	5M*2 paired-end	0	FALSE	NA
PRJEB6337	QinNan2014	ERS475112_ERS475113	China	Healthy	5M*2 paired-end	0.0213024	FALSE	NA
PRJEB6337	QinNan2014	ERS475114_ERS475115	China	Healthy	5M*2 paired-end	0.121466	TRUE	mix HD-22 - HD-16
PRJEB6337	QinNan2014	ERS475116_ERS475117	China	Healthy	5M*2 paired-end	0	FALSE	NA
PRJEB6337	QinNan2014	ERS475118_ERS475119	China	Healthy	5M*2 paired-end	0.0994681	FALSE	NA
PRJEB6337	QinNan2014	ERS475122	China	Healthy	5M*2 paired-end	0.00886476	FALSE	NA
PRJEB6337	QinNan2014	ERS475120_ERS475121	China	Healthy	5M*2 paired-end	0	FALSE	NA
PRJEB6337	QinNan2014	ERS475123	China	Healthy	5M*2 paired-end	0	FALSE	NA
PRJEB6337	QinNan2014	ERS475124	China	Healthy	5M*2 paired-end	0	FALSE	NA
PRJEB6337	QinNan2014	ERS475125	China	Healthy	5M*2 paired-end	0.0578466	TRUE	mix HD-22 - HD-16
PRJEB6337	QinNan2014	ERS475126	China	Healthy	5M*2 paired-end	0	FALSE	NA
PRJEB6337	QinNan2014	ERS475127	China	Healthy	5M*2 paired-end	0	FALSE	NA
PRJEB6337	QinNan2014	ERS475128_ERS475129	China	Healthy	5M*2 paired-end	0	FALSE	NA
PRJEB6337	QinNan2014	ERS475130	China	Healthy	5M*2 paired-end	0.0633737	FALSE	NA
PRJEB6337	QinNan2014	ERS475131	China	Healthy	5M*2 paired-end	0.0940963	FALSE	NA
PRJEB6337	QinNan2014	ERS475132	China	Healthy	5M*2 paired-end	0	FALSE	NA
PRJEB6337	QinNan2014	ERS475133	China	Healthy	5M*2 paired-end	0.052977	TRUE	HD-29 contaminated 1/3 by HV11 & HV24
PRJEB6337	QinNan2014	ERS475134_ERS475135	China	Healthy	5M*2 paired-end	0	TRUE	mix HV3 - HD-3
PRJEB6337	QinNan2014	ERS475136	China	Healthy	5M*2 paired-end	0	FALSE	NA
PRJEB6337	QinNan2014	ERS475137	China	Healthy	5M*2 paired-end	0.103942	FALSE	NA
PRJEB6337	QinNan2014	ERS475138	China	Healthy	5M*2 paired-end	0.113929	FALSE	NA
PRJEB6337	QinNan2014	ERS475139	China	Healthy	5M*2 paired-end	0.0199337	TRUE	HD-33 contaminated 1/3 by HV8
PRJEB6337	QinNan2014	ERS475140	China	Healthy	5M*2 paired-end	0.186121	FALSE	NA
PRJEB6337	QinNan2014	ERS475141	China	Healthy	5M*2 paired-end	0.182817	FALSE	NA
PRJEB6337	QinNan2014	ERS475142	China	Healthy	5M*2 paired-end	0.258175	FALSE	NA
PRJEB6337	QinNan2014	ERS475143_ERS475144	China	Healthy	5M*2 paired-end	0.0323607	FALSE	NA
PRJEB6337	QinNan2014	ERS475145	China	Healthy	5M*2 paired-end	0.0550927	FALSE	NA
PRJEB6337	QinNan2014	ERS475146_ERS475147	China	Healthy	5M*2 paired-end	0.022278	FALSE	NA
PRJEB6337	QinNan2014	ERS475148	China	Healthy	5M*2 paired-end	0.0225662	FALSE	NA
PRJEB6337	QinNan2014	ERS475149	China	Healthy	5M*2 paired-end	0.0413931	FALSE	NA
PRJEB6337	QinNan2014	ERS475150	China	Healthy	5M*2 paired-end	0.0257007	FALSE	NA
PRJEB6337	QinNan2014	ERS475151	China	Healthy	5M*2 paired-end	0	FALSE	NA
PRJEB6337	QinNan2014	ERS475152_ERS475153	China	Healthy	5M*2 paired-end	0	FALSE	NA
PRJEB6337	QinNan2014	ERS475154_ERS475155	China	Healthy	5M*2 paired-end	0	FALSE	NA
PRJEB6337	QinNan2014	ERS475156_ERS475157	China	Healthy	5M*2 paired-end	0	FALSE	NA
PRJEB6337	QinNan2014	ERS475158	China	Healthy	5M*2 paired-end	0	FALSE	NA
PRJEB6337	QinNan2014	ERS475159_ERS475160	China	Healthy	5M*2 paired-end	0	FALSE	NA
PRJEB6337	QinNan2014	ERS475161	China	Healthy	5M*2 paired-end	0.0414745	FALSE	NA
PRJEB6337	QinNan2014	ERS475162_ERS475163	China	Healthy	5M*2 paired-end	0	FALSE	NA
PRJEB6337	QinNan2014	ERS475164	China	Healthy	5M*2 paired-end	0.0510139	FALSE	NA
PRJEB6337	QinNan2014	ERS475165	China	Healthy	5M*2 paired-end	0	TRUE	error : LD-70 duplicate
PRJEB6337	QinNan2014	ERS475166	China	Healthy	5M*2 paired-end	0.0322108	FALSE	NA
PRJEB6337	QinNan2014	ERS475167	China	Healthy	5M*2 paired-end	0.0210384	FALSE	NA
PRJEB6337	QinNan2014	ERS475168	China	Healthy	5M*2 paired-end	0.0189126	FALSE	NA
PRJEB6337	QinNan2014	ERS475169_ERS475170	China	Healthy	5M*2 paired-end	0.100797	FALSE	NA
PRJEB6337	QinNan2014	ERS475171_ERS475172	China	Healthy	5M*2 paired-end	0	FALSE	NA
PRJEB6337	QinNan2014	ERS475173	China	Healthy	5M*2 paired-end	0.0545879	TRUE	HD-56 contaminated 1/3 by LD-86
PRJEB6337	QinNan2014	ERS475174_ERS475175	China	Healthy	5M*2 paired-end	0.0903941	FALSE	NA
PRJEB6337	QinNan2014	ERS475176	China	Healthy	5M*2 paired-end	0.0509552	FALSE	NA
PRJEB6337	QinNan2014	ERS475177_ERS475178	China	Healthy	5M*2 paired-end	0.053535	FALSE	NA
PRJEB6337	QinNan2014	ERS475179_ERS475180	China	Healthy	5M*2 paired-end	0	FALSE	NA
PRJEB6337	QinNan2014	ERS475181	China	Healthy	5M*2 paired-end	0.0667199	FALSE	NA
PRJEB6337	QinNan2014	ERS475182	China	Healthy	5M*2 paired-end	0	FALSE	NA
PRJEB6337	QinNan2014	ERS475183	China	Healthy	5M*2 paired-end	0.0238775	FALSE	NA
PRJEB6337	QinNan2014	ERS475184	China	Healthy	5M*2 paired-end	0.120131	FALSE	NA
PRJEB6337	QinNan2014	ERS475185	China	Healthy	5M*2 paired-end	0	FALSE	NA
PRJEB6337	QinNan2014	ERS475186	China	Healthy	5M*2 paired-end	0.0321245	FALSE	NA
PRJEB6337	QinNan2014	ERS475187	China	Healthy	5M*2 paired-end	0	FALSE	NA
PRJEB6337	QinNan2014	ERS475188	China	Healthy	5M*2 paired-end	0.0296787	FALSE	NA
PRJEB6337	QinNan2014	ERS475189	China	Healthy	5M*2 paired-end	0	FALSE	NA
PRJEB6337	QinNan2014	ERS475190	China	Healthy	5M*2 paired-end	0.0133207	FALSE	NA
PRJEB6337	QinNan2014	ERS475191	China	Healthy	5M*2 paired-end	0	FALSE	NA
PRJEB6337	QinNan2014	ERS475192	China	Healthy	5M*2 paired-end	0	FALSE	NA
PRJEB6337	QinNan2014	ERS475193	China	Healthy	5M*2 paired-end	0.0366007	TRUE	mix HD-72 - HD-71
PRJEB6337	QinNan2014	ERS475194	China	Healthy	5M*2 paired-end	0.0941035	TRUE	mix HD-72 - HD-71
PRJEB6337	QinNan2014	ERS475195	China	Healthy	5M*2 paired-end	0.0873776	FALSE	NA
PRJEB6337	QinNan2014	ERS475196	China	Healthy	5M*2 paired-end	0.086219	FALSE	NA
PRJEB6337	QinNan2014	ERS475197	China	Healthy	5M*2 paired-end	0.0269877	FALSE	NA
PRJEB6337	QinNan2014	ERS475198	China	Healthy	5M*2 paired-end	0	FALSE	NA
PRJEB6337	QinNan2014	ERS475199	China	Healthy	5M*2 paired-end	0	FALSE	NA
PRJEB6337	QinNan2014	ERS475200	China	Healthy	5M*2 paired-end	0.0533366	FALSE	NA
PRJEB6337	QinNan2014	ERS475201	China	Healthy	5M*2 paired-end	0	FALSE	NA
PRJEB6337	QinNan2014	ERS475202	China	Healthy	5M*2 paired-end	0.0186503	FALSE	NA
PRJEB6337	QinNan2014	ERS475203	China	Healthy	5M*2 paired-end	0	FALSE	NA
PRJEB6337	QinNan2014	ERS475204	China	Healthy	5M*2 paired-end	0.12309	FALSE	NA
PRJEB6337	QinNan2014	ERS475205	China	Healthy	5M*2 paired-end	0	FALSE	NA
PRJEB6337	QinNan2014	ERS475206	China	Healthy	5M*2 paired-end	0.0191702	FALSE	NA
PRJEB6337	QinNan2014	ERS475207	China	Healthy	5M*2 paired-end	0.0304239	FALSE	NA
PRJEB6337	QinNan2014	ERS475208	China	Healthy	5M*2 paired-end	0	FALSE	NA
PRJEB6337	QinNan2014	ERS475209	China	Healthy	5M*2 paired-end	0.0713614	FALSE	NA
PRJEB6337	QinNan2014	ERS475210_ERS475211	China	Healthy	5M*2 paired-end	0.0459085	TRUE	mix HV24 - HV11
PRJEB6337	QinNan2014	ERS475212	China	Healthy	5M*2 paired-end	0.155187	FALSE	NA
PRJEB6337	QinNan2014	ERS475213_ERS475214	China	Healthy	5M*2 paired-end	0	FALSE	NA
PRJEB6337	QinNan2014	ERS475215_ERS475216	China	Healthy	5M*2 paired-end	0.0085718	FALSE	NA
PRJEB6337	QinNan2014	ERS475217_ERS475218	China	Healthy	5M*2 paired-end	0.0112887	FALSE	NA
PRJEB6337	QinNan2014	ERS475219	China	Healthy	5M*2 paired-end	0.0173539	FALSE	NA
PRJEB6337	QinNan2014	ERS475220	China	Healthy	5M*2 paired-end	0.00983504	FALSE	NA
PRJEB6337	QinNan2014	ERS475221_ERS475222	China	Healthy	5M*2 paired-end	0.0166915	FALSE	NA
PRJEB6337	QinNan2014	ERS475223_ERS475224	China	Healthy	5M*2 paired-end	0	FALSE	NA
PRJEB6337	QinNan2014	ERS475225	China	Healthy	5M*2 paired-end	0	FALSE	NA
PRJEB6337	QinNan2014	ERS475226_ERS475227	China	Healthy	5M*2 paired-end	0.0907371	FALSE	NA
PRJEB6337	QinNan2014	ERS475228	China	Healthy	5M*2 paired-end	0.011677	FALSE	NA
PRJEB6337	QinNan2014	ERS475229	China	Healthy	5M*2 paired-end	0	FALSE	NA
PRJEB6337	QinNan2014	ERS475230	China	Healthy	5M*2 paired-end	0	FALSE	NA
PRJEB6337	QinNan2014	ERS475231	China	Healthy	5M*2 paired-end	0.0774633	TRUE	mix HV24 - HV11
PRJEB6337	QinNan2014	ERS475232	China	Healthy	5M*2 paired-end	0	FALSE	NA
PRJEB6337	QinNan2014	ERS475233	China	Healthy	5M*2 paired-end	0.146179	FALSE	NA
PRJEB6337	QinNan2014	ERS475234	China	Healthy	5M*2 paired-end	0.125046	FALSE	NA
PRJEB6337	QinNan2014	ERS475235	China	Healthy	5M*2 paired-end	0.546507	FALSE	NA
PRJEB6337	QinNan2014	ERS475236	China	Healthy	5M*2 paired-end	0	FALSE	NA
PRJEB6337	QinNan2014	ERS475237	China	Healthy	5M*2 paired-end	0	TRUE	mix HV3 - HD-3
PRJEB6337	QinNan2014	ERS475238	China	Healthy	5M*2 paired-end	0.0162398	FALSE	NA
PRJEB6337	QinNan2014	ERS475239	China	Healthy	5M*2 paired-end	0.0801895	FALSE	NA
PRJEB6337	QinNan2014	ERS475240_ERS475241	China	Healthy	5M*2 paired-end	0.041194	FALSE	NA
PRJEB6337	QinNan2014	ERS475242	China	Healthy	5M*2 paired-end	0	FALSE	NA
PRJEB6337	QinNan2014	ERS475243	China	Healthy	5M*2 paired-end	0	FALSE	NA
PRJEB6337	QinNan2014	ERS475244	China	Healthy	5M*2 paired-end	0.0455687	FALSE	NA
PRJEB6337	QinNan2014	ERS475245_ERS475246	China	Healthy	5M*2 paired-end	0.0327608	FALSE	NA
PRJEB6337	QinNan2014	ERS475247	China	Healthy	5M*2 paired-end	0	FALSE	NA
PRJEB6337	QinNan2014	ERS475248	China	Liver cirrhosis	5M*2 paired-end	0	FALSE	NA
PRJEB6337	QinNan2014	ERS475249_ERS475250	China	Liver cirrhosis	5M*2 paired-end	0	FALSE	NA
PRJEB6337	QinNan2014	ERS475251	China	Liver cirrhosis	5M*2 paired-end	0	TRUE	error : HD-6 duplicate
PRJEB6337	QinNan2014	ERS475252	China	Liver cirrhosis	5M*2 paired-end	0	FALSE	NA
PRJEB6337	QinNan2014	ERS475253_ERS475254	China	Liver cirrhosis	5M*2 paired-end	0	FALSE	NA
PRJEB6337	QinNan2014	ERS475255	China	Liver cirrhosis	5M*2 paired-end	0.0373179	FALSE	NA
PRJEB6337	QinNan2014	ERS475256	China	Liver cirrhosis	5M*2 paired-end	0.00824662	FALSE	NA
PRJEB6337	QinNan2014	ERS475257	China	Liver cirrhosis	5M*2 paired-end	0	FALSE	NA
PRJEB6337	QinNan2014	ERS475258	China	Liver cirrhosis	5M*2 paired-end	0	FALSE	NA
PRJEB6337	QinNan2014	ERS475259_ERS475260	China	Liver cirrhosis	5M*2 paired-end	0	FALSE	NA
PRJEB6337	QinNan2014	ERS475261	China	Liver cirrhosis	5M*2 paired-end	0	FALSE	NA
PRJEB6337	QinNan2014	ERS475262_ERS475263	China	Liver cirrhosis	5M*2 paired-end	0	FALSE	NA
PRJEB6337	QinNan2014	ERS475264	China	Liver cirrhosis	5M*2 paired-end	0	FALSE	NA
PRJEB6337	QinNan2014	ERS475265_ERS475266	China	Liver cirrhosis	5M*2 paired-end	0	FALSE	NA
PRJEB6337	QinNan2014	ERS475267	China	Liver cirrhosis	5M*2 paired-end	0	FALSE	NA
PRJEB6337	QinNan2014	ERS475268	China	Liver cirrhosis	5M*2 paired-end	0	FALSE	NA
PRJEB6337	QinNan2014	ERS475269_ERS475270	China	Liver cirrhosis	5M*2 paired-end	0	FALSE	NA
PRJEB6337	QinNan2014	ERS475271_ERS475272	China	Liver cirrhosis	5M*2 paired-end	0.0234111	FALSE	NA
PRJEB6337	QinNan2014	ERS475273	China	Liver cirrhosis	5M*2 paired-end	0.0507282	TRUE	mix LV8 - LD-26
PRJEB6337	QinNan2014	ERS475274_ERS475275_ERS475276	China	Liver cirrhosis	5M*2 paired-end	0	FALSE	NA
PRJEB6337	QinNan2014	ERS475277_ERS475278	China	Liver cirrhosis	5M*2 paired-end	0	TRUE	LD-28 contaminated 1/4 by LD-29
PRJEB6337	QinNan2014	ERS475279	China	Liver cirrhosis	5M*2 paired-end	0.0288714	TRUE	LD-29 contaminated 1/100 by LD-97
PRJEB6337	QinNan2014	ERS475280	China	Liver cirrhosis	5M*2 paired-end	0	FALSE	NA
PRJEB6337	QinNan2014	ERS475281_ERS475282_ERS475283	China	Liver cirrhosis	5M*2 paired-end	0.0214038	FALSE	NA
PRJEB6337	QinNan2014	ERS475284_ERS475285_ERS475286	China	Liver cirrhosis	5M*2 paired-end	0	FALSE	NA
PRJEB6337	QinNan2014	ERS475287_ERS475288	China	Liver cirrhosis	5M*2 paired-end	0	FALSE	NA
PRJEB6337	QinNan2014	ERS475289	China	Liver cirrhosis	5M*2 paired-end	0	FALSE	NA
PRJEB6337	QinNan2014	ERS475290	China	Liver cirrhosis	5M*2 paired-end	0	FALSE	NA
PRJEB6337	QinNan2014	ERS475291	China	Liver cirrhosis	5M*2 paired-end	0.383191	FALSE	NA
PRJEB6337	QinNan2014	ERS475292_ERS475293_ERS475294	China	Liver cirrhosis	5M*2 paired-end	0	FALSE	NA
PRJEB6337	QinNan2014	ERS475295	China	Liver cirrhosis	5M*2 paired-end	0	FALSE	NA
PRJEB6337	QinNan2014	ERS475296	China	Liver cirrhosis	5M*2 paired-end	0.0102112	FALSE	NA
PRJEB6337	QinNan2014	ERS475297	China	Liver cirrhosis	5M*2 paired-end	0	FALSE	NA
PRJEB6337	QinNan2014	ERS475298	China	Liver cirrhosis	5M*2 paired-end	0	FALSE	NA
PRJEB6337	QinNan2014	ERS475299_ERS475300_ERS475301	China	Liver cirrhosis	5M*2 paired-end	0	FALSE	NA
PRJEB6337	QinNan2014	ERS475302	China	Liver cirrhosis	5M*2 paired-end	0	FALSE	NA
PRJEB6337	QinNan2014	ERS475303	China	Liver cirrhosis	5M*2 paired-end	0.0141414	FALSE	NA
PRJEB6337	QinNan2014	ERS475304	China	Liver cirrhosis	5M*2 paired-end	0	FALSE	NA
PRJEB6337	QinNan2014	ERS475305	China	Liver cirrhosis	5M*2 paired-end	0	FALSE	NA
PRJEB6337	QinNan2014	ERS475306	China	Liver cirrhosis	5M*2 paired-end	0	FALSE	NA
PRJEB6337	QinNan2014	ERS475307	China	Liver cirrhosis	5M*2 paired-end	0.0123089	FALSE	NA
PRJEB6337	QinNan2014	ERS475308_ERS475309	China	Liver cirrhosis	5M*2 paired-end	0	FALSE	NA
PRJEB6337	QinNan2014	ERS475310_ERS475311	China	Liver cirrhosis	5M*2 paired-end	0	FALSE	NA
PRJEB6337	QinNan2014	ERS475312_ERS475313	China	Liver cirrhosis	5M*2 paired-end	0	FALSE	NA
PRJEB6337	QinNan2014	ERS475314	China	Liver cirrhosis	5M*2 paired-end	0	FALSE	NA
PRJEB6337	QinNan2014	ERS475315	China	Liver cirrhosis	5M*2 paired-end	0	FALSE	NA
PRJEB6337	QinNan2014	ERS475316	China	Liver cirrhosis	5M*2 paired-end	0	TRUE	LD-51 contaminated 1/3 by LD-71
PRJEB6337	QinNan2014	ERS475317	China	Liver cirrhosis	5M*2 paired-end	0	FALSE	NA
PRJEB6337	QinNan2014	ERS475318	China	Liver cirrhosis	5M*2 paired-end	0	FALSE	NA
PRJEB6337	QinNan2014	ERS475319	China	Liver cirrhosis	5M*2 paired-end	0	FALSE	NA
PRJEB6337	QinNan2014	ERS475320_ERS475321	China	Liver cirrhosis	5M*2 paired-end	0	FALSE	NA
PRJEB6337	QinNan2014	ERS475322_ERS475323	China	Liver cirrhosis	5M*2 paired-end	0	FALSE	NA
PRJEB6337	QinNan2014	ERS475324	China	Liver cirrhosis	5M*2 paired-end	0	FALSE	NA
PRJEB6337	QinNan2014	ERS475325	China	Liver cirrhosis	5M*2 paired-end	0	FALSE	NA
PRJEB6337	QinNan2014	ERS475326	China	Liver cirrhosis	5M*2 paired-end	0	FALSE	NA
PRJEB6337	QinNan2014	ERS475327_ERS475328	China	Liver cirrhosis	5M*2 paired-end	0.0405331	FALSE	NA
PRJEB6337	QinNan2014	ERS475329	China	Liver cirrhosis	5M*2 paired-end	0	FALSE	NA
PRJEB6337	QinNan2014	ERS475330	China	Liver cirrhosis	5M*2 paired-end	0	FALSE	NA
PRJEB6337	QinNan2014	ERS475331	China	Liver cirrhosis	5M*2 paired-end	0	FALSE	NA
PRJEB6337	QinNan2014	ERS475332	China	Liver cirrhosis	5M*2 paired-end	0	FALSE	NA
PRJEB6337	QinNan2014	ERS475333_ERS475334	China	Liver cirrhosis	5M*2 paired-end	0	FALSE	NA
PRJEB6337	QinNan2014	ERS475335_ERS475336_ERS475337	China	Liver cirrhosis	5M*2 paired-end	0.0703114	FALSE	NA
PRJEB6337	QinNan2014	ERS475338	China	Liver cirrhosis	5M*2 paired-end	0	FALSE	NA
PRJEB6337	QinNan2014	ERS475339_ERS475340	China	Liver cirrhosis	5M*2 paired-end	0.0494185	FALSE	NA
PRJEB6337	QinNan2014	ERS475341	China	Liver cirrhosis	5M*2 paired-end	0	FALSE	NA
PRJEB6337	QinNan2014	ERS475342	China	Liver cirrhosis	5M*2 paired-end	0	FALSE	NA
PRJEB6337	QinNan2014	ERS475343	China	Liver cirrhosis	5M*2 paired-end	0	FALSE	NA
PRJEB6337	QinNan2014	ERS475344_ERS475345	China	Liver cirrhosis	5M*2 paired-end	0	FALSE	NA
PRJEB6337	QinNan2014	ERS475346_ERS475347	China	Liver cirrhosis	5M*2 paired-end	0	FALSE	NA
PRJEB6337	QinNan2014	ERS475348	China	Liver cirrhosis	5M*2 paired-end	0	FALSE	NA
PRJEB6337	QinNan2014	ERS475349	China	Liver cirrhosis	5M*2 paired-end	0	TRUE	LD-73 contaminated 1/3 by LD-55
PRJEB6337	QinNan2014	ERS475350	China	Liver cirrhosis	5M*2 paired-end	0.0356798	FALSE	NA
PRJEB6337	QinNan2014	ERS475351	China	Liver cirrhosis	5M*2 paired-end	0	FALSE	NA
PRJEB6337	QinNan2014	ERS475352	China	Liver cirrhosis	5M*2 paired-end	0	FALSE	NA
PRJEB6337	QinNan2014	ERS475353	China	Liver cirrhosis	5M*2 paired-end	0	FALSE	NA
PRJEB6337	QinNan2014	ERS475354	China	Liver cirrhosis	5M*2 paired-end	0	FALSE	NA
PRJEB6337	QinNan2014	ERS475355	China	Liver cirrhosis	5M*2 paired-end	0	FALSE	NA
PRJEB6337	QinNan2014	ERS475356	China	Liver cirrhosis	5M*2 paired-end	0	FALSE	NA
PRJEB6337	QinNan2014	ERS475357	China	Liver cirrhosis	5M*2 paired-end	0	FALSE	NA
PRJEB6337	QinNan2014	ERS475358	China	Liver cirrhosis	5M*2 paired-end	0	FALSE	NA
PRJEB6337	QinNan2014	ERS475359	China	Liver cirrhosis	5M*2 paired-end	0.00970009	FALSE	NA
PRJEB6337	QinNan2014	ERS475360	China	Liver cirrhosis	5M*2 paired-end	0	FALSE	NA
PRJEB6337	QinNan2014	ERS475361	China	Liver cirrhosis	5M*2 paired-end	0	FALSE	NA
PRJEB6337	QinNan2014	ERS475362	China	Liver cirrhosis	5M*2 paired-end	0	FALSE	NA
PRJEB6337	QinNan2014	ERS475363	China	Liver cirrhosis	5M*2 paired-end	0	FALSE	NA
PRJEB6337	QinNan2014	ERS475364_ERS475365	China	Liver cirrhosis	5M*2 paired-end	0	FALSE	NA
PRJEB6337	QinNan2014	ERS475366	China	Liver cirrhosis	5M*2 paired-end	0	FALSE	NA
PRJEB6337	QinNan2014	ERS475367	China	Liver cirrhosis	5M*2 paired-end	0	FALSE	NA
PRJEB6337	QinNan2014	ERS475368	China	Liver cirrhosis	5M*2 paired-end	0	TRUE	too few reads (<10M)
PRJEB6337	QinNan2014	ERS475369	China	Liver cirrhosis	5M*2 paired-end	0	FALSE	NA
PRJEB6337	QinNan2014	ERS475370	China	Liver cirrhosis	5M*2 paired-end	0	FALSE	NA
PRJEB6337	QinNan2014	ERS475371	China	Liver cirrhosis	5M*2 paired-end	0	FALSE	NA
PRJEB6337	QinNan2014	ERS475372	China	Liver cirrhosis	5M*2 paired-end	0.00725733	FALSE	NA
PRJEB6337	QinNan2014	ERS475373	China	Liver cirrhosis	5M*2 paired-end	0	FALSE	NA
PRJEB6337	QinNan2014	ERS475374	China	Liver cirrhosis	5M*2 paired-end	0	FALSE	NA
PRJEB6337	QinNan2014	ERS475375	China	Liver cirrhosis	5M*2 paired-end	0	FALSE	NA
PRJEB6337	QinNan2014	ERS475376	China	Liver cirrhosis	5M*2 paired-end	0.028231	FALSE	NA
PRJEB6337	QinNan2014	ERS475377_ERS475378	China	Liver cirrhosis	5M*2 paired-end	0	FALSE	NA
PRJEB6337	QinNan2014	ERS475379_ERS475380	China	Liver cirrhosis	5M*2 paired-end	0	FALSE	NA
PRJEB6337	QinNan2014	ERS475381_ERS475382	China	Liver cirrhosis	5M*2 paired-end	0	FALSE	NA
PRJEB6337	QinNan2014	ERS475383	China	Liver cirrhosis	5M*2 paired-end	0	FALSE	NA
PRJEB6337	QinNan2014	ERS475384	China	Liver cirrhosis	5M*2 paired-end	0	FALSE	NA
PRJEB6337	QinNan2014	ERS475385_ERS475386	China	Liver cirrhosis	5M*2 paired-end	0	FALSE	NA
PRJEB6337	QinNan2014	ERS475387_ERS475388	China	Liver cirrhosis	5M*2 paired-end	0.138647	FALSE	NA
PRJEB6337	QinNan2014	ERS475389_ERS475390	China	Liver cirrhosis	5M*2 paired-end	0	FALSE	NA
PRJEB6337	QinNan2014	ERS475391	China	Liver cirrhosis	5M*2 paired-end	0	FALSE	NA
PRJEB6337	QinNan2014	ERS475392	China	Liver cirrhosis	5M*2 paired-end	0	FALSE	NA
PRJEB6337	QinNan2014	ERS475393_ERS475394	China	Liver cirrhosis	5M*2 paired-end	0	FALSE	NA
PRJEB6337	QinNan2014	ERS475395	China	Liver cirrhosis	5M*2 paired-end	0	FALSE	NA
PRJEB6337	QinNan2014	ERS475396_ERS475397	China	Liver cirrhosis	5M*2 paired-end	0	TRUE	LV2 contaminated 1/20 by HV23
PRJEB6337	QinNan2014	ERS475398	China	Liver cirrhosis	5M*2 paired-end	0	FALSE	NA
PRJEB6337	QinNan2014	ERS475399	China	Liver cirrhosis	5M*2 paired-end	0.0299276	FALSE	NA
PRJEB6337	QinNan2014	ERS475400	China	Liver cirrhosis	5M*2 paired-end	0	FALSE	NA
PRJEB6337	QinNan2014	ERS475401	China	Liver cirrhosis	5M*2 paired-end	0.0203526	FALSE	NA
PRJEB6337	QinNan2014	ERS475402	China	Liver cirrhosis	5M*2 paired-end	0	FALSE	NA
PRJEB6337	QinNan2014	ERS475403_ERS475404_ERS475405	China	Liver cirrhosis	5M*2 paired-end	0.00956898	TRUE	too few reads (<10M)
PRJEB6337	QinNan2014	ERS475406_ERS475407	China	Liver cirrhosis	5M*2 paired-end	0	FALSE	NA
PRJEB6337	QinNan2014	ERS475408_ERS475409	China	Liver cirrhosis	5M*2 paired-end	0	FALSE	NA
PRJEB6337	QinNan2014	ERS475410_ERS475411	China	Liver cirrhosis	5M*2 paired-end	0.00991187	TRUE	LV5 contaminated 1/10 by HV11 & HV24
PRJEB6337	QinNan2014	ERS475412	China	Liver cirrhosis	5M*2 paired-end	0	FALSE	NA
PRJEB6337	QinNan2014	ERS475413_ERS475414	China	Liver cirrhosis	5M*2 paired-end	0	FALSE	NA
PRJEB6337	QinNan2014	ERS475415	China	Liver cirrhosis	5M*2 paired-end	0.0179787	TRUE	mix LV8 - LD-26
PRJEB6337	QinNan2014	ERS475416	China	Liver cirrhosis	5M*2 paired-end	0	FALSE	NA

## Sheet: Cohort Fig4
bioproject	project_alias	sample_accession	country	group	subgroup	num_reads_subsampled	ae_seq_coverage	excluded	excluded_reason
PRJEB40200	Sole2021	ERS5094861	Spain	Liver cirrhosis	AD	5M single-end	0	FALSE	NA
PRJEB40200	Sole2021	ERS5094862	Spain	Liver cirrhosis	AD	5M single-end	0	FALSE	NA
PRJEB40200	Sole2021	ERS5094863	Spain	Liver cirrhosis	ACLF	5M single-end	0	FALSE	NA
PRJEB40200	Sole2021	ERS5094864	Spain	Liver cirrhosis	AD	5M single-end	0	FALSE	NA
PRJEB40200	Sole2021	ERS5094865	Spain	Liver cirrhosis	ACLF	5M single-end	0	FALSE	NA
PRJEB40200	Sole2021	ERS5094866	Spain	Liver cirrhosis	ACLF	5M single-end	0	FALSE	NA
PRJEB40200	Sole2021	ERS5094867	Spain	Liver cirrhosis	AD	5M single-end	0	FALSE	NA
PRJEB40200	Sole2021	ERS5094868	Spain	Liver cirrhosis	AD	5M single-end	0.0243049	FALSE	NA
PRJEB40200	Sole2021	ERS5094869	Spain	Liver cirrhosis	AD	5M single-end	0	FALSE	NA
PRJEB40200	Sole2021	ERS5094870	Spain	Liver cirrhosis	ACLF	5M single-end	0.00946642	TRUE	too few reads (<5M)
PRJEB40200	Sole2021	ERS5094871	Spain	Liver cirrhosis	AD	5M single-end	0	FALSE	NA
PRJEB40200	Sole2021	ERS5094872	Spain	Liver cirrhosis	AD	5M single-end	0	FALSE	NA
PRJEB40200	Sole2021	ERS5094873	Spain	Liver cirrhosis	AD	5M single-end	0	FALSE	NA
PRJEB40200	Sole2021	ERS5094874	Spain	Liver cirrhosis	AD	5M single-end	0	FALSE	NA
PRJEB40200	Sole2021	ERS5094875	Spain	Liver cirrhosis	ACLF	5M single-end	0	FALSE	NA
PRJEB40200	Sole2021	ERS5094876	Spain	Liver cirrhosis	ACLF	5M single-end	0	FALSE	NA
PRJEB40200	Sole2021	ERS5094877	Spain	Liver cirrhosis	AD	5M single-end	0	FALSE	NA
PRJEB40200	Sole2021	ERS5094878	Spain	Liver cirrhosis	AD	5M single-end	0	FALSE	NA
PRJEB40200	Sole2021	ERS5094879	Spain	Liver cirrhosis	AD	5M single-end	0	FALSE	NA
PRJEB40200	Sole2021	ERS5094880	Spain	Liver cirrhosis	ACLF	5M single-end	0	FALSE	NA
PRJEB40200	Sole2021	ERS5094881	Spain	Liver cirrhosis	AD	5M single-end	0	FALSE	NA
PRJEB40200	Sole2021	ERS5094882	Spain	Liver cirrhosis	ACLF	5M single-end	0	FALSE	NA
PRJEB40200	Sole2021	ERS5094883	Spain	Liver cirrhosis	ACLF	5M single-end	0	FALSE	NA
PRJEB40200	Sole2021	ERS5094884	Spain	Liver cirrhosis	AD	5M single-end	0	FALSE	NA
PRJEB40200	Sole2021	ERS5094885	Spain	Liver cirrhosis	AD	5M single-end	0	FALSE	NA
PRJEB40200	Sole2021	ERS5094886	Spain	Liver cirrhosis	AD	5M single-end	0	FALSE	NA
PRJEB40200	Sole2021	ERS5094887	Spain	Liver cirrhosis	ACLF	5M single-end	0.0303516	FALSE	NA
PRJEB40200	Sole2021	ERS5094888	Spain	Liver cirrhosis	AD	5M single-end	0	FALSE	NA
PRJEB40200	Sole2021	ERS5094889	Spain	Liver cirrhosis	ACLF	5M single-end	0	FALSE	NA
PRJEB40200	Sole2021	ERS5094890	Spain	Liver cirrhosis	AD	5M single-end	0	FALSE	NA
PRJEB40200	Sole2021	ERS5094891	Spain	Liver cirrhosis	ACLF	5M single-end	0	FALSE	NA
PRJEB40200	Sole2021	ERS5094892	Spain	Liver cirrhosis	AD	5M single-end	0	FALSE	NA
PRJEB40200	Sole2021	ERS5094893	Spain	Liver cirrhosis	ACLF	5M single-end	0	FALSE	NA
PRJEB40200	Sole2021	ERS5094894	Spain	Liver cirrhosis	ACLF	5M single-end	0	FALSE	NA
PRJEB40200	Sole2021	ERS5094895	Spain	Liver cirrhosis	ACLF	5M single-end	0	TRUE	too few reads (<5M)
PRJEB40200	Sole2021	ERS5094896	Spain	NA	NA	5M single-end	0	TRUE	not in final paper
PRJEB40200	Sole2021	ERS5094897	Spain	Liver cirrhosis	ACLF	5M single-end	0.0367547	FALSE	NA
PRJEB40200	Sole2021	ERS5094898	Spain	NA	NA	5M single-end	0	TRUE	not in final paper
PRJEB40200	Sole2021	ERS5094899	Spain	Liver cirrhosis	ACLF	5M single-end	0	FALSE	NA
PRJEB40200	Sole2021	ERS5094900	Spain	Liver cirrhosis	AD	5M single-end	0	FALSE	NA
PRJEB40200	Sole2021	ERS5094901	Spain	NA	NA	5M single-end	0	TRUE	not in final paper
PRJEB40200	Sole2021	ERS5094902	Spain	Liver cirrhosis	ACLF	5M single-end	0	TRUE	too few reads (<5M)
PRJEB40200	Sole2021	ERS5094903	Spain	Liver cirrhosis	AD	5M single-end	0	FALSE	NA
PRJEB40200	Sole2021	ERS5094904	Spain	Liver cirrhosis	AD	5M single-end	0	FALSE	NA
PRJEB40200	Sole2021	ERS5094905	Spain	Liver cirrhosis	AD	5M single-end	0	FALSE	NA
PRJEB40200	Sole2021	ERS5094906	Spain	Liver cirrhosis	ACLF	5M single-end	0	FALSE	NA
PRJEB40200	Sole2021	ERS5094907	Spain	Liver cirrhosis	AD	5M single-end	0	FALSE	NA
PRJEB40200	Sole2021	ERS5094908	Spain	Liver cirrhosis	AD	5M single-end	0	FALSE	NA
PRJEB40200	Sole2021	ERS5094909	Spain	Liver cirrhosis	Decompensated	5M single-end	0	FALSE	NA
PRJEB40200	Sole2021	ERS5094910	Spain	Liver cirrhosis	ACLF	5M single-end	0	FALSE	NA
PRJEB40200	Sole2021	ERS5094911	Spain	Liver cirrhosis	AD	5M single-end	0	FALSE	NA
PRJEB40200	Sole2021	ERS5094912	Spain	Liver cirrhosis	Decompensated	5M single-end	0	FALSE	NA
PRJEB40200	Sole2021	ERS5094913	Spain	Liver cirrhosis	AD	5M single-end	0	FALSE	NA
PRJEB40200	Sole2021	ERS5094914	Spain	Liver cirrhosis	ACLF	5M single-end	0	FALSE	NA
PRJEB40200	Sole2021	ERS5094915	Spain	NA	NA	5M single-end	0	TRUE	not in final paper
PRJEB40200	Sole2021	ERS5094916	Spain	Liver cirrhosis	ACLF	5M single-end	0	FALSE	NA
PRJEB40200	Sole2021	ERS5094917	Spain	Liver cirrhosis	AD	5M single-end	0	FALSE	NA
PRJEB40200	Sole2021	ERS5094918	Spain	Liver cirrhosis	ACLF	5M single-end	0	FALSE	NA
PRJEB40200	Sole2021	ERS5094919	Spain	Liver cirrhosis	Decompensated	5M single-end	0	FALSE	NA
PRJEB40200	Sole2021	ERS5094920	Spain	Liver cirrhosis	AD	5M single-end	0	FALSE	NA
PRJEB40200	Sole2021	ERS5094921	Spain	Liver cirrhosis	AD	5M single-end	0	FALSE	NA
PRJEB40200	Sole2021	ERS5094922	Spain	Liver cirrhosis	AD	5M single-end	0	FALSE	NA
PRJEB40200	Sole2021	ERS5094923	Spain	Liver cirrhosis	Decompensated	5M single-end	0	FALSE	NA
PRJEB40200	Sole2021	ERS5094924	Spain	Liver cirrhosis	AD	5M single-end	0	FALSE	NA
PRJEB40200	Sole2021	ERS5094925	Spain	Liver cirrhosis	AD	5M single-end	0	FALSE	NA
PRJEB40200	Sole2021	ERS5094926	Spain	NA	NA	5M single-end	0	TRUE	not in final paper
PRJEB40200	Sole2021	ERS5094927	Spain	Liver cirrhosis	Compensated	5M single-end	0	FALSE	NA
PRJEB40200	Sole2021	ERS5094928	Spain	Liver cirrhosis	ACLF	5M single-end	0.0127953	FALSE	NA
PRJEB40200	Sole2021	ERS5094929	Spain	Liver cirrhosis	AD	5M single-end	0	FALSE	NA
PRJEB40200	Sole2021	ERS5094930	Spain	Liver cirrhosis	AD	5M single-end	0	FALSE	NA
PRJEB40200	Sole2021	ERS5094931	Spain	Liver cirrhosis	AD	5M single-end	0	FALSE	NA
PRJEB40200	Sole2021	ERS5094932	Spain	Liver cirrhosis	AD	5M single-end	0	FALSE	NA
PRJEB40200	Sole2021	ERS5094933	Spain	Liver cirrhosis	Compensated	5M single-end	0	FALSE	NA
PRJEB40200	Sole2021	ERS5094934	Spain	Liver cirrhosis	Compensated	5M single-end	0.00599697	FALSE	NA
PRJEB40200	Sole2021	ERS5094935	Spain	Liver cirrhosis	AD	5M single-end	0	FALSE	NA
PRJEB40200	Sole2021	ERS5094936	Spain	Liver cirrhosis	AD	5M single-end	0	FALSE	NA
PRJEB40200	Sole2021	ERS5094937	Spain	Liver cirrhosis	AD	5M single-end	0	FALSE	NA
PRJEB40200	Sole2021	ERS5094938	Spain	Liver cirrhosis	AD	5M single-end	0	FALSE	NA
PRJEB40200	Sole2021	ERS5094939	Spain	NA	NA	5M single-end	0	TRUE	not in final paper
PRJEB40200	Sole2021	ERS5094940	Spain	Liver cirrhosis	Compensated	5M single-end	0.0284438	FALSE	NA
PRJEB40200	Sole2021	ERS5094941	Spain	Liver cirrhosis	AD	5M single-end	0	FALSE	NA
PRJEB40200	Sole2021	ERS5094942	Spain	Liver cirrhosis	AD	5M single-end	0	FALSE	NA
PRJEB40200	Sole2021	ERS5094943	Spain	Liver cirrhosis	AD	5M single-end	0	FALSE	NA
PRJEB40200	Sole2021	ERS5094944	Spain	NA	NA	5M single-end	0	TRUE	not in final paper
PRJEB40200	Sole2021	ERS5094945	Spain	Liver cirrhosis	ACLF	5M single-end	0	FALSE	NA
PRJEB40200	Sole2021	ERS5094946	Spain	Liver cirrhosis	Compensated	5M single-end	0.0187847	FALSE	NA
PRJEB40200	Sole2021	ERS5094947	Spain	Liver cirrhosis	Compensated	5M single-end	0	FALSE	NA
PRJEB40200	Sole2021	ERS5094948	Spain	Liver cirrhosis	Compensated	5M single-end	0.0495182	FALSE	NA
PRJEB40200	Sole2021	ERS5094949	Spain	Liver cirrhosis	AD	5M single-end	0	FALSE	NA
PRJEB40200	Sole2021	ERS5094950	Spain	Liver cirrhosis	AD	5M single-end	0	FALSE	NA
PRJEB40200	Sole2021	ERS5094951	Spain	Liver cirrhosis	AD	5M single-end	0	FALSE	NA
PRJEB40200	Sole2021	ERS5094952	Spain	Liver cirrhosis	AD	5M single-end	0	FALSE	NA
PRJEB40200	Sole2021	ERS5094953	Spain	Liver cirrhosis	Decompensated	5M single-end	0.063269	FALSE	NA
PRJEB40200	Sole2021	ERS5094954	Spain	Liver cirrhosis	AD	5M single-end	0	FALSE	NA
PRJEB40200	Sole2021	ERS5094955	Spain	Liver cirrhosis	AD	5M single-end	0.00592898	FALSE	NA
PRJEB40200	Sole2021	ERS5094956	Spain	Liver cirrhosis	ACLF	5M single-end	0	FALSE	NA
PRJEB40200	Sole2021	ERS5094957	Spain	Liver cirrhosis	AD	5M single-end	0	FALSE	NA
PRJEB40200	Sole2021	ERS5094958	Spain	Liver cirrhosis	AD	5M single-end	0	FALSE	NA
PRJEB40200	Sole2021	ERS5094959	Spain	Liver cirrhosis	ACLF	5M single-end	0	FALSE	NA
PRJEB40200	Sole2021	ERS5094960	Spain	Liver cirrhosis	AD	5M single-end	0	FALSE	NA
PRJEB40200	Sole2021	ERS5094961	Spain	NA	NA	5M single-end	0	TRUE	not in final paper
PRJEB40200	Sole2021	ERS5094962	Spain	NA	NA	5M single-end	0	TRUE	not in final paper
PRJEB40200	Sole2021	ERS5094963	Spain	NA	NA	5M single-end	0	TRUE	not in final paper
PRJEB40200	Sole2021	ERS5094964	Spain	Liver cirrhosis	AD	5M single-end	0	FALSE	NA
PRJEB40200	Sole2021	ERS5094965	Spain	Liver cirrhosis	ACLF	5M single-end	0	FALSE	NA
PRJEB40200	Sole2021	ERS5094966	Spain	Liver cirrhosis	Compensated	5M single-end	0	FALSE	NA
PRJEB40200	Sole2021	ERS5094967	Spain	Liver cirrhosis	ACLF	5M single-end	0	FALSE	NA
PRJEB40200	Sole2021	ERS5094968	Spain	Liver cirrhosis	AD	5M single-end	0	FALSE	NA
PRJEB40200	Sole2021	ERS5094969	Spain	Liver cirrhosis	Decompensated	5M single-end	0	FALSE	NA
PRJEB40200	Sole2021	ERS5094970	Spain	Liver cirrhosis	Compensated	5M single-end	0	FALSE	NA
PRJEB40200	Sole2021	ERS5094971	Spain	Liver cirrhosis	ACLF	5M single-end	0	FALSE	NA
PRJEB40200	Sole2021	ERS5094972	Spain	Liver cirrhosis	Compensated	5M single-end	0.00566913	FALSE	NA
PRJEB40200	Sole2021	ERS5094973	Spain	Liver cirrhosis	Compensated	5M single-end	0.175586	FALSE	NA
PRJEB40200	Sole2021	ERS5094974	Spain	Liver cirrhosis	Compensated	5M single-end	0.075831	FALSE	NA
PRJEB40200	Sole2021	ERS5094975	Spain	Liver cirrhosis	ACLF	5M single-end	0	FALSE	NA
PRJEB40200	Sole2021	ERS5094976	Spain	Liver cirrhosis	ACLF	5M single-end	0	FALSE	NA
PRJEB40200	Sole2021	ERS5094977	Spain	Liver cirrhosis	Compensated	5M single-end	0	FALSE	NA
PRJEB40200	Sole2021	ERS5094978	Spain	Liver cirrhosis	AD	5M single-end	0	FALSE	NA
PRJEB40200	Sole2021	ERS5094979	Spain	Liver cirrhosis	ACLF	5M single-end	0	FALSE	NA
PRJEB40200	Sole2021	ERS5094980	Spain	Liver cirrhosis	ACLF	5M single-end	0	FALSE	NA
PRJEB40200	Sole2021	ERS5094981	Spain	Liver cirrhosis	Decompensated	5M single-end	0	FALSE	NA
PRJEB40200	Sole2021	ERS5094982	Spain	Liver cirrhosis	AD	5M single-end	0	FALSE	NA
PRJEB40200	Sole2021	ERS5094983	Spain	NA	NA	5M single-end	0	TRUE	not in final paper
PRJEB40200	Sole2021	ERS5094984	Spain	Liver cirrhosis	Compensated	5M single-end	0	FALSE	NA
PRJEB40200	Sole2021	ERS5094985	Spain	Liver cirrhosis	AD	5M single-end	0	FALSE	NA
PRJEB40200	Sole2021	ERS5094986	Spain	Liver cirrhosis	Compensated	5M single-end	0	FALSE	NA
PRJEB40200	Sole2021	ERS5094987	Spain	Liver cirrhosis	ACLF	5M single-end	0	FALSE	NA
PRJEB40200	Sole2021	ERS5094988	Spain	Liver cirrhosis	ACLF	5M single-end	0	FALSE	NA
PRJEB40200	Sole2021	ERS5094989	Spain	Liver cirrhosis	Compensated	5M single-end	0.0128886	FALSE	NA
PRJEB40200	Sole2021	ERS5094990	Spain	Liver cirrhosis	ACLF	5M single-end	0	FALSE	NA
PRJEB40200	Sole2021	ERS5094991	Spain	Liver cirrhosis	AD	5M single-end	0	FALSE	NA
PRJEB40200	Sole2021	ERS5094992	Spain	Liver cirrhosis	AD	5M single-end	0	FALSE	NA
PRJEB40200	Sole2021	ERS5094993	Spain	Liver cirrhosis	AD	5M single-end	0	FALSE	NA
PRJEB40200	Sole2021	ERS5094994	Spain	Liver cirrhosis	AD	5M single-end	0	FALSE	NA
PRJEB40200	Sole2021	ERS5094995	Spain	Liver cirrhosis	AD	5M single-end	0	FALSE	NA
PRJEB40200	Sole2021	ERS5094996	Spain	Liver cirrhosis	ACLF	5M single-end	0	FALSE	NA
PRJEB40200	Sole2021	ERS5094997	Spain	Liver cirrhosis	ACLF	5M single-end	0	FALSE	NA
PRJEB40200	Sole2021	ERS5094998	Spain	Liver cirrhosis	AD	5M single-end	0	FALSE	NA
PRJEB40200	Sole2021	ERS5094999	Spain	Liver cirrhosis	Compensated	5M single-end	0.0258147	FALSE	NA
PRJEB40200	Sole2021	ERS5095000	Spain	Liver cirrhosis	AD	5M single-end	0	FALSE	NA
PRJEB40200	Sole2021	ERS5095001	Spain	Liver cirrhosis	ACLF	5M single-end	0	FALSE	NA
PRJEB40200	Sole2021	ERS5095002	Spain	Liver cirrhosis	AD	5M single-end	0	FALSE	NA
PRJEB40200	Sole2021	ERS5095003	Spain	Liver cirrhosis	AD	5M single-end	0.0384118	FALSE	NA
PRJEB40200	Sole2021	ERS5095004	Spain	Liver cirrhosis	ACLF	5M single-end	0	FALSE	NA
PRJEB40200	Sole2021	ERS5095005	Spain	Liver cirrhosis	Compensated	5M single-end	0.00788687	FALSE	NA
PRJEB40200	Sole2021	ERS5095006	Spain	Liver cirrhosis	AD	5M single-end	0	FALSE	NA
PRJEB40200	Sole2021	ERS5095007	Spain	Liver cirrhosis	ACLF	5M single-end	0	FALSE	NA
PRJEB40200	Sole2021	ERS5095008	Spain	Liver cirrhosis	ACLF	5M single-end	0	FALSE	NA
PRJEB40200	Sole2021	ERS5095009	Spain	Liver cirrhosis	AD	5M single-end	0	FALSE	NA
PRJEB40200	Sole2021	ERS5095010	Spain	Liver cirrhosis	Compensated	5M single-end	0.0149512	FALSE	NA
PRJEB40200	Sole2021	ERS5095011	Spain	Liver cirrhosis	AD	5M single-end	0	FALSE	NA
PRJEB40200	Sole2021	ERS5095012	Spain	Liver cirrhosis	ACLF	5M single-end	0	FALSE	NA
PRJEB40200	Sole2021	ERS5095013	Spain	Liver cirrhosis	AD	5M single-end	0	FALSE	NA
PRJEB40200	Sole2021	ERS5095014	Spain	Liver cirrhosis	AD	5M single-end	0	FALSE	NA
PRJEB40200	Sole2021	ERS5095015	Spain	Liver cirrhosis	AD	5M single-end	0	FALSE	NA
PRJEB40200	Sole2021	ERS5095016	Spain	Liver cirrhosis	AD	5M single-end	0	FALSE	NA
PRJEB40200	Sole2021	ERS5095017	Spain	Liver cirrhosis	ACLF	5M single-end	0	FALSE	NA
PRJEB40200	Sole2021	ERS5095018	Spain	Liver cirrhosis	AD	5M single-end	0	FALSE	NA
PRJEB40200	Sole2021	ERS5095019	Spain	Liver cirrhosis	Compensated	5M single-end	0	FALSE	NA
PRJEB40200	Sole2021	ERS5095020	Spain	Liver cirrhosis	ACLF	5M single-end	0	FALSE	NA
PRJEB40200	Sole2021	ERS5095021	Spain	Liver cirrhosis	ACLF	5M single-end	0	TRUE	too few reads (<5M)
PRJEB40200	Sole2021	ERS5095022	Spain	Liver cirrhosis	ACLF	5M single-end	0	FALSE	NA
PRJEB40200	Sole2021	ERS5095023	Spain	Liver cirrhosis	AD	5M single-end	0	FALSE	NA
PRJEB40200	Sole2021	ERS5095024	Spain	Liver cirrhosis	AD	5M single-end	0	FALSE	NA
PRJEB40200	Sole2021	ERS5095025	Spain	Liver cirrhosis	ACLF	5M single-end	0	FALSE	NA
PRJEB40200	Sole2021	ERS5095026	Spain	Liver cirrhosis	AD	5M single-end	0	FALSE	NA
PRJEB40200	Sole2021	ERS5095027	Spain	Liver cirrhosis	AD	5M single-end	0	FALSE	NA
PRJEB40200	Sole2021	ERS5095028	Spain	Liver cirrhosis	AD	5M single-end	0	FALSE	NA
PRJEB40200	Sole2021	ERS5095029	Spain	Liver cirrhosis	Decompensated	5M single-end	0	FALSE	NA
PRJEB40200	Sole2021	ERS5095030	Spain	Liver cirrhosis	ACLF	5M single-end	0	FALSE	NA
PRJEB40200	Sole2021	ERS5095031	Spain	Liver cirrhosis	ACLF	5M single-end	0	FALSE	NA
PRJEB40200	Sole2021	ERS5095032	Spain	Liver cirrhosis	ACLF	5M single-end	0	FALSE	NA
PRJEB40200	Sole2021	ERS5095033	Spain	Liver cirrhosis	Compensated	5M single-end	0	FALSE	NA
PRJEB40200	Sole2021	ERS5095034	Spain	Liver cirrhosis	Compensated	5M single-end	0.0375278	FALSE	NA
PRJEB40200	Sole2021	ERS5095035	Spain	Liver cirrhosis	Compensated	5M single-end	0.0317481	FALSE	NA
PRJEB40200	Sole2021	ERS5095036	Spain	Liver cirrhosis	ACLF	5M single-end	0	FALSE	NA
PRJEB40200	Sole2021	ERS5095037	Spain	Liver cirrhosis	AD	5M single-end	0	FALSE	NA
PRJEB40200	Sole2021	ERS5095038	Spain	Liver cirrhosis	AD	5M single-end	0	FALSE	NA
PRJEB40200	Sole2021	ERS5095039	Spain	Liver cirrhosis	Compensated	5M single-end	0.0813426	FALSE	NA
PRJEB40200	Sole2021	ERS5095040	Spain	Liver cirrhosis	ACLF	5M single-end	0	TRUE	too few reads (<5M)
PRJEB40200	Sole2021	ERS5095041	Spain	Liver cirrhosis	AD	5M single-end	0	FALSE	NA
PRJEB40200	Sole2021	ERS5095042	Spain	Liver cirrhosis	ACLF	5M single-end	0	FALSE	NA
PRJEB1220	metaHIT_healthy	ERS199287	Spain	Healthy	Healthy	5M forward	0.0408602	FALSE	NA
PRJEB1220	metaHIT_healthy	ERS199292	Spain	Healthy	Healthy	5M forward	0.0476028	FALSE	NA
PRJEB1220	metaHIT_healthy	ERS199297	Spain	Healthy	Healthy	5M forward	0.0231331	FALSE	NA
PRJEB1220	metaHIT_healthy	ERS199302	Spain	Healthy	Healthy	5M forward	0.022732	FALSE	NA
PRJEB1220	metaHIT_healthy	ERS199305	Spain	Healthy	Healthy	5M forward	0.386145	FALSE	NA
PRJEB1220	metaHIT_healthy	ERS199306	Spain	Healthy	Healthy	5M forward	0.118583	FALSE	NA
PRJEB1220	metaHIT_healthy	ERS199309	Spain	Healthy	Healthy	5M forward	0.0387442	FALSE	NA
PRJEB5224	metaHIT_healthy	ERS396454	Spain	Healthy	Healthy	5M forward	0.177429	FALSE	NA
PRJEB5224	metaHIT_healthy	ERS396463	Spain	Healthy	Healthy	5M forward	0	FALSE	NA
PRJEB5224	metaHIT_healthy	ERS396471	Spain	Healthy	Healthy	5M forward	0.0360898	FALSE	NA
PRJEB5224	metaHIT_healthy	ERS396472	Spain	Healthy	Healthy	5M forward	0.102673	FALSE	NA
PRJEB5224	metaHIT_healthy	ERS396474	Spain	Healthy	Healthy	5M forward	0.949209	FALSE	NA
PRJEB5224	metaHIT_healthy	ERS396477	Spain	Healthy	Healthy	5M forward	0.0520674	FALSE	NA
PRJEB5224	metaHIT_healthy	ERS396480	Spain	Healthy	Healthy	5M forward	0	FALSE	NA
PRJEB5224	metaHIT_healthy	ERS396481	Spain	Healthy	Healthy	5M forward	0.00668577	FALSE	NA
PRJEB5224	metaHIT_healthy	ERS396484	Spain	Healthy	Healthy	5M forward	0.117577	FALSE	NA
PRJEB5224	metaHIT_healthy	ERS396487	Spain	Healthy	Healthy	5M forward	0.486163	FALSE	NA
PRJEB5224	metaHIT_healthy	ERS396488	Spain	Healthy	Healthy	5M forward	0.114549	FALSE	NA
PRJEB5224	metaHIT_healthy	ERS396489	Spain	Healthy	Healthy	5M forward	0	FALSE	NA
PRJEB5224	metaHIT_healthy	ERS396491	Spain	Healthy	Healthy	5M forward	0.0425508	FALSE	NA
PRJEB5224	metaHIT_healthy	ERS396492	Spain	Healthy	Healthy	5M forward	0.0251635	FALSE	NA
PRJEB5224	metaHIT_healthy	ERS396493	Spain	Healthy	Healthy	5M forward	0.00545726	FALSE	NA
PRJEB5224	metaHIT_healthy	ERS396494	Spain	Healthy	Healthy	5M forward	0.0293113	FALSE	NA
PRJEB5224	metaHIT_healthy	ERS396495	Spain	Healthy	Healthy	5M forward	0.311345	FALSE	NA
PRJEB5224	metaHIT_healthy	ERS396496	Spain	Healthy	Healthy	5M forward	0.425586	FALSE	NA
PRJEB5224	metaHIT_healthy	ERS396497	Spain	Healthy	Healthy	5M forward	0.401578	FALSE	NA
PRJEB5224	metaHIT_healthy	ERS396498	Spain	Healthy	Healthy	5M forward	0.294458	FALSE	NA
PRJEB5224	metaHIT_healthy	ERS396499	Spain	Healthy	Healthy	5M forward	0	FALSE	NA
PRJEB5224	metaHIT_healthy	ERS396501	Spain	Healthy	Healthy	5M forward	0	FALSE	NA
PRJEB5224	metaHIT_healthy	ERS396505	Spain	Healthy	Healthy	5M forward	0	FALSE	NA
PRJEB5224	metaHIT_healthy	ERS396506	Spain	Healthy	Healthy	5M forward	0.166554	FALSE	NA
PRJEB5224	metaHIT_healthy	ERS396507	Spain	Healthy	Healthy	5M forward	0.0498853	FALSE	NA
PRJEB5224	metaHIT_healthy	ERS396511	Spain	Healthy	Healthy	5M forward	1.18602	FALSE	NA
PRJEB5224	metaHIT_healthy	ERS396519	Spain	Healthy	Healthy	5M forward	0	FALSE	NA
PRJEB5224	metaHIT_healthy	ERS396520	Spain	Healthy	Healthy	5M forward	0	FALSE	NA
PRJEB5224	metaHIT_healthy	ERS396521	Spain	Healthy	Healthy	5M forward	0	FALSE	NA
PRJEB5224	metaHIT_healthy	ERS396522	Spain	Healthy	Healthy	5M forward	0.0157683	FALSE	NA
PRJEB5224	metaHIT_healthy	ERS396526	Spain	Healthy	Healthy	5M forward	0	FALSE	NA
