# Supplementary material for: <em>Adlercreutzia equolifaciens</em> Is an Anti-inflammatory Commensal Bacterium with Decreased Abundance in Gut Microbiota of Patients with Metabolic Liver Disease
Source: Preprints.org preprint supplement (doi:10.20944/preprints202305.2093.v1), 2023-05-30
Supplement: Supplementary file 2 [file Supplementary Table 2.xlsx]

## Sheet: genome_summary
genome	strain_name	type_strain	source	genome_type	country	continent	host	genome_size	n50	checkm.completeness	checkm.contamination	checkm2.completeness	checkm2.contamination	gtdb_r207_classification	pass.GUNC	excluded	excluded_comment	equol_biosynthesis
GCA_000478885.1	DSM 19450	A. equolifaciens	GenBank	Isolate	Japan	Asia	Homo sapiens	2862526	2862526	100	0.81	100	1.13	d__Bacteria;p__Actinobacteriota;c__Coriobacteriia;o__Coriobacteriales;f__Eggerthellaceae;g__Adlercreutzia;s__Adlercreutzia equolifaciens	TRUE	FALSE	NA	TRUE
GCA_003340305.1	AP38TSA	NA	GenBank	Isolate	Spain	Europe	Homo sapiens	2822848	154931	100	0.81	99.97	0.58	d__Bacteria;p__Actinobacteriota;c__Coriobacteriia;o__Coriobacteriales;f__Eggerthellaceae;g__Adlercreutzia;s__Adlercreutzia celatus_A	TRUE	FALSE	NA	FALSE
GCA_003340325.1	OB21 GAM 11	NA	GenBank	Isolate	Canada	North America	Homo sapiens	2680191	75477	100	0.2	99.92	0.16	d__Bacteria;p__Actinobacteriota;c__Coriobacteriia;o__Coriobacteriales;f__Eggerthellaceae;g__Adlercreutzia;s__Adlercreutzia celatus_A	TRUE	FALSE	NA	FALSE
GCA_003726015.1	DSM 18785	A. equolifaciens subsp. celata	GenBank	Isolate	Japan	Asia	Rattus norvegicus	2894143	134918	100	0.2	99.98	0.62	d__Bacteria;p__Actinobacteriota;c__Coriobacteriia;o__Coriobacteriales;f__Eggerthellaceae;g__Adlercreutzia;s__Adlercreutzia equolifaciens	TRUE	FALSE	NA	TRUE
GCA_009755265.1	ResAG-91	A. rubneri	GenBank	Isolate	Germany	Europe	Homo sapiens	2798076	107842	100	0	99.94	0.52	d__Bacteria;p__Actinobacteriota;c__Coriobacteriia;o__Coriobacteriales;f__Eggerthellaceae;g__Adlercreutzia;s__Adlercreutzia celatus_A	TRUE	FALSE	NA	FALSE
GCA_009874275.1	IPLA 37004	NA	GenBank	Isolate	Spain	Europe	Homo sapiens	2663312	101827	100	1.57	99.94	0.08	d__Bacteria;p__Actinobacteriota;c__Coriobacteriia;o__Coriobacteriales;f__Eggerthellaceae;g__Adlercreutzia;s__Adlercreutzia equolifaciens	TRUE	FALSE	NA	FALSE
GCA_011405655.1	8CFCBH1	A. hattorii	GenBank	Isolate	Japan	Asia	Homo sapiens	2908404	2908404	100	1.08	99.96	1.05	d__Bacteria;p__Actinobacteriota;c__Coriobacteriia;o__Coriobacteriales;f__Eggerthellaceae;g__Adlercreutzia;s__Adlercreutzia celatus_A	TRUE	FALSE	NA	FALSE
GCA_019972915.1	9CBH6	NA	GenBank	Isolate	Japan	Asia	Homo sapiens	2858962	158258	100	0.81	99.99	1.71	d__Bacteria;p__Actinobacteriota;c__Coriobacteriia;o__Coriobacteriales;f__Eggerthellaceae;g__Adlercreutzia;s__Adlercreutzia equolifaciens	TRUE	FALSE	NA	TRUE
GCA_020558135.1	DFI.6.48	NA	GenBank	Isolate	United States	North America	Homo sapiens	2770157	238322	100	0.81	99.99	0.31	d__Bacteria;p__Actinobacteriota;c__Coriobacteriia;o__Coriobacteriales;f__Eggerthellaceae;g__Adlercreutzia;s__Adlercreutzia celatus_A	TRUE	FALSE	NA	FALSE
GCA_020558765.1	DFI.6.17	NA	GenBank	Isolate	United States	North America	Homo sapiens	2772040	238322	100	0.81	99.98	0.26	d__Bacteria;p__Actinobacteriota;c__Coriobacteriia;o__Coriobacteriales;f__Eggerthellaceae;g__Adlercreutzia;s__Adlercreutzia celatus_A	TRUE	FALSE	NA	FALSE
GQMETA001__bin27	NA	NA	MIMIC2_PlazaOnate2021	MAG	Canada	North America	Mus musculus	2351795	23044	87.39	0	85.96	0.16	d__Bacteria;p__Actinobacteriota;c__Coriobacteriia;o__Coriobacteriales;f__Eggerthellaceae;g__Adlercreutzia;s__Adlercreutzia equolifaciens	TRUE	FALSE	NA	TRUE
GQMETA003__bin33	NA	NA	MIMIC2_PlazaOnate2021	MAG	Canada	North America	Mus musculus	2313964	25036	92.64	1.29	91.69	4.32	d__Bacteria;p__Actinobacteriota;c__Coriobacteriia;o__Coriobacteriales;f__Eggerthellaceae;g__Adlercreutzia;s__Adlercreutzia equolifaciens	TRUE	FALSE	NA	TRUE
GQMETA005__bin9	NA	NA	MIMIC2_PlazaOnate2021	MAG	Canada	North America	Mus musculus	2326720	38465	96.03	0	90.86	0.33	d__Bacteria;p__Actinobacteriota;c__Coriobacteriia;o__Coriobacteriales;f__Eggerthellaceae;g__Adlercreutzia;s__Adlercreutzia equolifaciens	TRUE	FALSE	NA	TRUE
GQMETA007__bin11	NA	NA	MIMIC2_PlazaOnate2021	MAG	Canada	North America	Mus musculus	2237378	21514	88.9	0	85.92	0.18	d__Bacteria;p__Actinobacteriota;c__Coriobacteriia;o__Coriobacteriales;f__Eggerthellaceae;g__Adlercreutzia;s__Adlercreutzia equolifaciens	TRUE	FALSE	NA	TRUE
GQMETA008__bin6	NA	NA	MIMIC2_PlazaOnate2021	MAG	Canada	North America	Mus musculus	2073019	21295	87.97	0.4	82.34	0.62	d__Bacteria;p__Actinobacteriota;c__Coriobacteriia;o__Coriobacteriales;f__Eggerthellaceae;g__Adlercreutzia;s__Adlercreutzia celatus_A	TRUE	FALSE	NA	FALSE
GQMETA009__bin58	NA	NA	MIMIC2_PlazaOnate2021	MAG	Canada	North America	Mus musculus	2366085	44774	93.79	0	90.44	0.29	d__Bacteria;p__Actinobacteriota;c__Coriobacteriia;o__Coriobacteriales;f__Eggerthellaceae;g__Adlercreutzia;s__Adlercreutzia equolifaciens	TRUE	FALSE	NA	TRUE
GQMETA013__bin64	NA	NA	MIMIC2_PlazaOnate2021	MAG	Canada	North America	Mus musculus	2284572	18603	92.81	0.08	89.51	0.39	d__Bacteria;p__Actinobacteriota;c__Coriobacteriia;o__Coriobacteriales;f__Eggerthellaceae;g__Adlercreutzia;s__Adlercreutzia equolifaciens	TRUE	FALSE	NA	TRUE
GQMETA014__bin51	NA	NA	MIMIC2_PlazaOnate2021	MAG	Canada	North America	Mus musculus	2450832	22968	94.45	0.4	92.1	0.22	d__Bacteria;p__Actinobacteriota;c__Coriobacteriia;o__Coriobacteriales;f__Eggerthellaceae;g__Adlercreutzia;s__Adlercreutzia equolifaciens	TRUE	FALSE	NA	TRUE
GQMETA015__bin4	NA	NA	MIMIC2_PlazaOnate2021	MAG	Canada	North America	Mus musculus	2485781	44578	96.04	1.32	96.39	2.12	d__Bacteria;p__Actinobacteriota;c__Coriobacteriia;o__Coriobacteriales;f__Eggerthellaceae;g__Adlercreutzia;s__Adlercreutzia equolifaciens	TRUE	FALSE	NA	TRUE
GQMETA022__bin30	NA	NA	MIMIC2_PlazaOnate2021	MAG	Canada	North America	Mus musculus	2400078	22565	90.9	4.84	85.13	3.88	d__Bacteria;p__Actinobacteriota;c__Coriobacteriia;o__Coriobacteriales;f__Eggerthellaceae;g__Adlercreutzia;s__Adlercreutzia equolifaciens	TRUE	FALSE	NA	TRUE
KIJ_genome_10569	NA	NA	HRGM_Kim2021	MAG	Korea	Asia	Homo sapiens	2956078	88190	98.39	0.87	100	0.6	d__Bacteria;p__Actinobacteriota;c__Coriobacteriia;o__Coriobacteriales;f__Eggerthellaceae;g__Adlercreutzia;s__Adlercreutzia equolifaciens	TRUE	FALSE	NA	TRUE
KIJ_genome_11351	NA	NA	HRGM_Kim2021	MAG	Korea	Asia	Homo sapiens	2618273	152541	94.01	3.23	90.87	4.58	d__Bacteria;p__Actinobacteriota;c__Coriobacteriia;o__Coriobacteriales;f__Eggerthellaceae;g__Adlercreutzia;s__Adlercreutzia equolifaciens	TRUE	FALSE	NA	FALSE
KIJ_genome_11574	NA	NA	HRGM_Kim2021	MAG	Korea	Asia	Homo sapiens	2493351	60401	96.77	0.4	96.76	0.68	d__Bacteria;p__Actinobacteriota;c__Coriobacteriia;o__Coriobacteriales;f__Eggerthellaceae;g__Adlercreutzia;s__Adlercreutzia celatus_A	TRUE	FALSE	NA	FALSE
KIJ_genome_1164	NA	NA	HRGM_Kim2021	MAG	Korea	Asia	Homo sapiens	2714898	69138	100	1.61	99.95	4.34	d__Bacteria;p__Actinobacteriota;c__Coriobacteriia;o__Coriobacteriales;f__Eggerthellaceae;g__Adlercreutzia;s__Adlercreutzia equolifaciens	TRUE	FALSE	NA	TRUE
KIJ_genome_12238	NA	NA	HRGM_Kim2021	MAG	Korea	Asia	Homo sapiens	2326135	40352	90.05	0.81	85.13	0.21	d__Bacteria;p__Actinobacteriota;c__Coriobacteriia;o__Coriobacteriales;f__Eggerthellaceae;g__Adlercreutzia;s__Adlercreutzia celatus_A	TRUE	FALSE	NA	FALSE
KIJ_genome_13042	NA	NA	HRGM_Kim2021	MAG	Japan	Asia	Homo sapiens	2342244	9112	89.64	1.61	87.35	0.34	d__Bacteria;p__Actinobacteriota;c__Coriobacteriia;o__Coriobacteriales;f__Eggerthellaceae;g__Adlercreutzia;s__Adlercreutzia equolifaciens	TRUE	FALSE	NA	TRUE
KIJ_genome_13108	NA	NA	HRGM_Kim2021	MAG	Japan	Asia	Homo sapiens	2231731	5586	80.12	0.87	80.03	2.1	d__Bacteria;p__Actinobacteriota;c__Coriobacteriia;o__Coriobacteriales;f__Eggerthellaceae;g__Adlercreutzia;s__Adlercreutzia equolifaciens	TRUE	FALSE	NA	FALSE
KIJ_genome_13390	NA	NA	HRGM_Kim2021	MAG	Korea	Asia	Homo sapiens	2719679	46404	97.98	0.48	99.8	1.53	d__Bacteria;p__Actinobacteriota;c__Coriobacteriia;o__Coriobacteriales;f__Eggerthellaceae;g__Adlercreutzia;s__Adlercreutzia equolifaciens	TRUE	FALSE	NA	TRUE
KIJ_genome_14511	NA	NA	HRGM_Kim2021	MAG	Japan	Asia	Homo sapiens	2040301	5548	85.61	0	80.31	0.48	d__Bacteria;p__Actinobacteriota;c__Coriobacteriia;o__Coriobacteriales;f__Eggerthellaceae;g__Adlercreutzia;s__Adlercreutzia equolifaciens	TRUE	FALSE	NA	FALSE
KIJ_genome_15205	NA	NA	HRGM_Kim2021	MAG	Korea	Asia	Homo sapiens	2494585	104415	95.18	0	93.97	0.47	d__Bacteria;p__Actinobacteriota;c__Coriobacteriia;o__Coriobacteriales;f__Eggerthellaceae;g__Adlercreutzia;s__Adlercreutzia equolifaciens	TRUE	FALSE	NA	FALSE
KIJ_genome_17204	NA	NA	HRGM_Kim2021	MAG	Japan	Asia	Homo sapiens	2600980	15836	91.53	1.81	91.15	3.81	d__Bacteria;p__Actinobacteriota;c__Coriobacteriia;o__Coriobacteriales;f__Eggerthellaceae;g__Adlercreutzia;s__Adlercreutzia equolifaciens	TRUE	FALSE	NA	TRUE
KIJ_genome_17994	NA	NA	HRGM_Kim2021	MAG	Korea	Asia	Homo sapiens	2418995	10179	94.51	0.27	94.11	0.71	d__Bacteria;p__Actinobacteriota;c__Coriobacteriia;o__Coriobacteriales;f__Eggerthellaceae;g__Adlercreutzia;s__Adlercreutzia equolifaciens	TRUE	FALSE	NA	TRUE
KIJ_genome_21695	NA	NA	HRGM_Kim2021	MAG	Korea	Asia	Homo sapiens	2596888	96504	95.09	0	96.84	1.22	d__Bacteria;p__Actinobacteriota;c__Coriobacteriia;o__Coriobacteriales;f__Eggerthellaceae;g__Adlercreutzia;s__Adlercreutzia celatus_A	TRUE	FALSE	NA	FALSE
KIJ_genome_22290	NA	NA	HRGM_Kim2021	MAG	Korea	Asia	Homo sapiens	2572458	37805	98.17	0.81	91.73	2.77	d__Bacteria;p__Actinobacteriota;c__Coriobacteriia;o__Coriobacteriales;f__Eggerthellaceae;g__Adlercreutzia;s__Adlercreutzia equolifaciens	TRUE	FALSE	NA	FALSE
KIJ_genome_22472	NA	NA	HRGM_Kim2021	MAG	Korea	Asia	Homo sapiens	2486894	7484	90.13	1.48	85.31	3.92	d__Bacteria;p__Actinobacteriota;c__Coriobacteriia;o__Coriobacteriales;f__Eggerthellaceae;g__Adlercreutzia;s__Adlercreutzia equolifaciens	FALSE	FALSE	NA	FALSE
KIJ_genome_23407	NA	NA	HRGM_Kim2021	MAG	Korea	Asia	Homo sapiens	2463072	43919	90.84	0.55	90.04	2.49	d__Bacteria;p__Actinobacteriota;c__Coriobacteriia;o__Coriobacteriales;f__Eggerthellaceae;g__Adlercreutzia;s__Adlercreutzia celatus_A	TRUE	FALSE	NA	FALSE
KIJ_genome_24013	NA	NA	HRGM_Kim2021	MAG	Korea	Asia	Homo sapiens	2554927	18568	95.18	1.34	92.71	1.43	d__Bacteria;p__Actinobacteriota;c__Coriobacteriia;o__Coriobacteriales;f__Eggerthellaceae;g__Adlercreutzia;s__Adlercreutzia equolifaciens	TRUE	FALSE	NA	TRUE
KIJ_genome_26228	NA	NA	HRGM_Kim2021	MAG	Korea	Asia	Homo sapiens	2324957	11826	88.46	0.81	85.59	0.62	d__Bacteria;p__Actinobacteriota;c__Coriobacteriia;o__Coriobacteriales;f__Eggerthellaceae;g__Adlercreutzia;s__Adlercreutzia equolifaciens	TRUE	FALSE	NA	TRUE
KIJ_genome_26654	NA	NA	HRGM_Kim2021	MAG	Korea	Asia	Homo sapiens	2622555	110246	100	0.81	99.85	1.14	d__Bacteria;p__Actinobacteriota;c__Coriobacteriia;o__Coriobacteriales;f__Eggerthellaceae;g__Adlercreutzia;s__Adlercreutzia equolifaciens	TRUE	FALSE	NA	FALSE
KIJ_genome_27667	NA	NA	HRGM_Kim2021	MAG	Korea	Asia	Homo sapiens	2792348	87230	93.55	0.92	97.96	1.18	d__Bacteria;p__Actinobacteriota;c__Coriobacteriia;o__Coriobacteriales;f__Eggerthellaceae;g__Adlercreutzia;s__Adlercreutzia equolifaciens	TRUE	FALSE	NA	FALSE
KIJ_genome_28457	NA	NA	HRGM_Kim2021	MAG	Korea	Asia	Homo sapiens	2527531	44170	92.14	0	93.26	0.89	d__Bacteria;p__Actinobacteriota;c__Coriobacteriia;o__Coriobacteriales;f__Eggerthellaceae;g__Adlercreutzia;s__Adlercreutzia equolifaciens	TRUE	FALSE	NA	TRUE
KIJ_genome_4837	NA	NA	HRGM_Kim2021	MAG	Korea	Asia	Homo sapiens	2469438	16367	94.51	0.89	86.91	1.06	d__Bacteria;p__Actinobacteriota;c__Coriobacteriia;o__Coriobacteriales;f__Eggerthellaceae;g__Adlercreutzia;s__Adlercreutzia equolifaciens	TRUE	FALSE	NA	TRUE
KIJ_genome_8242	NA	NA	HRGM_Kim2021	MAG	Korea	Asia	Homo sapiens	2483152	67387	95.94	0	90.75	0.07	d__Bacteria;p__Actinobacteriota;c__Coriobacteriia;o__Coriobacteriales;f__Eggerthellaceae;g__Adlercreutzia;s__Adlercreutzia celatus_A	FALSE	FALSE	NA	FALSE
KIJ_genome_9020	NA	NA	HRGM_Kim2021	MAG	Korea	Asia	Homo sapiens	2597550	98790	97.4	0.81	99.4	0.1	d__Bacteria;p__Actinobacteriota;c__Coriobacteriia;o__Coriobacteriales;f__Eggerthellaceae;g__Adlercreutzia;s__Adlercreutzia equolifaciens	TRUE	FALSE	NA	FALSE
MGYG000005721	NA	NA	UHGG_v2	MAG	China	Asia	Homo sapiens	2655325	75010	100	0	98.92	0.8	d__Bacteria;p__Actinobacteriota;c__Coriobacteriia;o__Coriobacteriales;f__Eggerthellaceae;g__Adlercreutzia;s__Adlercreutzia equolifaciens	TRUE	FALSE	NA	TRUE
MGYG000010812	NA	NA	UHGG_v2	MAG	China	Asia	Homo sapiens	2547605	13860	93.15	3.23	90.95	2.24	d__Bacteria;p__Actinobacteriota;c__Coriobacteriia;o__Coriobacteriales;f__Eggerthellaceae;g__Adlercreutzia;s__Adlercreutzia equolifaciens	TRUE	FALSE	NA	TRUE
MGYG000015385	NA	NA	UHGG_v2	MAG	China	Asia	Homo sapiens	2475285	54391	90.32	3.3	84.07	3.85	d__Bacteria;p__Actinobacteriota;c__Coriobacteriia;o__Coriobacteriales;f__Eggerthellaceae;g__Adlercreutzia;s__Adlercreutzia equolifaciens	FALSE	FALSE	NA	TRUE
MGYG000016365	NA	NA	UHGG_v2	MAG	United States	North America	Homo sapiens	2376415	8640	91.89	0.68	87.57	2.52	d__Bacteria;p__Actinobacteriota;c__Coriobacteriia;o__Coriobacteriales;f__Eggerthellaceae;g__Adlercreutzia;s__Adlercreutzia celatus_A	TRUE	FALSE	NA	FALSE
MGYG000016689	NA	NA	UHGG_v2	MAG	United Kingdom	Europe	Homo sapiens	2581661	92818	95.05	0.81	97.89	1.33	d__Bacteria;p__Actinobacteriota;c__Coriobacteriia;o__Coriobacteriales;f__Eggerthellaceae;g__Adlercreutzia;s__Adlercreutzia celatus_A	TRUE	FALSE	NA	FALSE
MGYG000021096	NA	NA	UHGG_v2	MAG	Austria	Europe	Homo sapiens	2322224	11742	81.72	3.16	82.42	1.09	d__Bacteria;p__Actinobacteriota;c__Coriobacteriia;o__Coriobacteriales;f__Eggerthellaceae;g__Adlercreutzia;s__Adlercreutzia celatus_A	TRUE	FALSE	NA	FALSE
MGYG000021129	NA	NA	UHGG_v2	MAG	Austria	Europe	Homo sapiens	2621133	37096	96.26	0.81	95.38	0.56	d__Bacteria;p__Actinobacteriota;c__Coriobacteriia;o__Coriobacteriales;f__Eggerthellaceae;g__Adlercreutzia;s__Adlercreutzia celatus_A	TRUE	FALSE	NA	FALSE
MGYG000022820	NA	NA	UHGG_v2	MAG	Sweden	Europe	Homo sapiens	2387144	5960	78.02	2.42	80.2	3.43	d__Bacteria;p__Actinobacteriota;c__Coriobacteriia;o__Coriobacteriales;f__Eggerthellaceae;g__Adlercreutzia;s__Adlercreutzia celatus_A	TRUE	FALSE	NA	FALSE
MGYG000030398	NA	NA	UHGG_v2	MAG	Austria	Europe	Homo sapiens	2415362	15843	85.02	1.77	82.07	2.38	d__Bacteria;p__Actinobacteriota;c__Coriobacteriia;o__Coriobacteriales;f__Eggerthellaceae;g__Adlercreutzia;s__Adlercreutzia celatus_A	TRUE	FALSE	NA	FALSE
MGYG000031484	NA	NA	UHGG_v2	MAG	Denmark	Europe	Homo sapiens	2652437	18080	97.31	1.21	93.13	1.49	d__Bacteria;p__Actinobacteriota;c__Coriobacteriia;o__Coriobacteriales;f__Eggerthellaceae;g__Adlercreutzia;s__Adlercreutzia celatus_A	FALSE	FALSE	NA	FALSE
MGYG000032609	NA	NA	UHGG_v2	MAG	China	Asia	Homo sapiens	2585849	18505	94.56	0.07	97.85	0.47	d__Bacteria;p__Actinobacteriota;c__Coriobacteriia;o__Coriobacteriales;f__Eggerthellaceae;g__Adlercreutzia;s__Adlercreutzia equolifaciens	TRUE	FALSE	NA	FALSE
MGYG000033842	NA	NA	UHGG_v2	MAG	United Kingdom	Europe	Homo sapiens	2393517	17689	91.05	0.27	84.88	2.57	d__Bacteria;p__Actinobacteriota;c__Coriobacteriia;o__Coriobacteriales;f__Eggerthellaceae;g__Adlercreutzia;s__Adlercreutzia celatus_A	TRUE	FALSE	NA	FALSE
MGYG000036067	NA	NA	UHGG_v2	MAG	Austria	Europe	Homo sapiens	2444720	33532	94.24	0.56	94.2	0.53	d__Bacteria;p__Actinobacteriota;c__Coriobacteriia;o__Coriobacteriales;f__Eggerthellaceae;g__Adlercreutzia;s__Adlercreutzia celatus_A	TRUE	FALSE	NA	FALSE
MGYG000041415	NA	NA	UHGG_v2	MAG	Austria	Europe	Homo sapiens	2231108	10115	89.08	0	83.28	1.21	d__Bacteria;p__Actinobacteriota;c__Coriobacteriia;o__Coriobacteriales;f__Eggerthellaceae;g__Adlercreutzia;s__Adlercreutzia celatus_A	TRUE	FALSE	NA	FALSE
MGYG000043062	NA	NA	UHGG_v2	MAG	Austria	Europe	Homo sapiens	2484183	6366	83.26	2.64	85.73	2.42	d__Bacteria;p__Actinobacteriota;c__Coriobacteriia;o__Coriobacteriales;f__Eggerthellaceae;g__Adlercreutzia;s__Adlercreutzia celatus_A	TRUE	FALSE	NA	FALSE
MGYG000043227	NA	NA	UHGG_v2	MAG	United States	North America	Homo sapiens	2563605	75538	96.98	0	98.66	0.78	d__Bacteria;p__Actinobacteriota;c__Coriobacteriia;o__Coriobacteriales;f__Eggerthellaceae;g__Adlercreutzia;s__Adlercreutzia celatus_A	TRUE	FALSE	NA	FALSE
MGYG000043885	NA	NA	UHGG_v2	MAG	Austria	Europe	Homo sapiens	2400610	39498	85.37	1.01	84.97	1.76	d__Bacteria;p__Actinobacteriota;c__Coriobacteriia;o__Coriobacteriales;f__Eggerthellaceae;g__Adlercreutzia;s__Adlercreutzia celatus_A	TRUE	FALSE	NA	FALSE
MGYG000045548	NA	NA	UHGG_v2	MAG	Austria	Europe	Homo sapiens	2446085	21530	98.19	0.75	92.92	2.07	d__Bacteria;p__Actinobacteriota;c__Coriobacteriia;o__Coriobacteriales;f__Eggerthellaceae;g__Adlercreutzia;s__Adlercreutzia celatus_A	TRUE	FALSE	NA	FALSE
MGYG000046430	NA	NA	UHGG_v2	MAG	Kazakhstan	Asia	Homo sapiens	2521866	9655	92.17	1.64	88.87	1.2	d__Bacteria;p__Actinobacteriota;c__Coriobacteriia;o__Coriobacteriales;f__Eggerthellaceae;g__Adlercreutzia;s__Adlercreutzia celatus_A	FALSE	FALSE	NA	FALSE
MGYG000046605	NA	NA	UHGG_v2	MAG	France	Europe	Homo sapiens	2335194	7635	88.43	3.5	80.89	1.94	d__Bacteria;p__Actinobacteriota;c__Coriobacteriia;o__Coriobacteriales;f__Eggerthellaceae;g__Adlercreutzia;s__Adlercreutzia celatus_A	TRUE	FALSE	NA	FALSE
MGYG000046947	NA	NA	UHGG_v2	MAG	Austria	Europe	Homo sapiens	2572991	8853	92.06	3.19	82.33	2.53	d__Bacteria;p__Actinobacteriota;c__Coriobacteriia;o__Coriobacteriales;f__Eggerthellaceae;g__Adlercreutzia;s__Adlercreutzia celatus_A	FALSE	FALSE	NA	FALSE
MGYG000049827	NA	NA	UHGG_v2	MAG	Austria	Europe	Homo sapiens	2464027	8925	92.49	4.48	86.05	3.78	d__Bacteria;p__Actinobacteriota;c__Coriobacteriia;o__Coriobacteriales;f__Eggerthellaceae;g__Adlercreutzia;s__Adlercreutzia celatus_A	FALSE	FALSE	NA	FALSE
MGYG000051073	NA	NA	UHGG_v2	MAG	Austria	Europe	Homo sapiens	2274341	15447	73.43	0.67	81.15	1.6	d__Bacteria;p__Actinobacteriota;c__Coriobacteriia;o__Coriobacteriales;f__Eggerthellaceae;g__Adlercreutzia;s__Adlercreutzia celatus_A	TRUE	FALSE	NA	FALSE
MGYG000051727	NA	NA	UHGG_v2	MAG	Austria	Europe	Homo sapiens	2596906	28665	93.3	0.81	90.53	1.31	d__Bacteria;p__Actinobacteriota;c__Coriobacteriia;o__Coriobacteriales;f__Eggerthellaceae;g__Adlercreutzia;s__Adlercreutzia celatus_A	TRUE	FALSE	NA	FALSE
MGYG000059492	NA	NA	UHGG_v2	MAG	Austria	Europe	Homo sapiens	2469967	52025	94.72	0	91.96	1.06	d__Bacteria;p__Actinobacteriota;c__Coriobacteriia;o__Coriobacteriales;f__Eggerthellaceae;g__Adlercreutzia;s__Adlercreutzia celatus_A	TRUE	FALSE	NA	FALSE
MGYG000060550	NA	NA	UHGG_v2	MAG	Austria	Europe	Homo sapiens	2551423	19179	95.16	0.56	94.56	0.05	d__Bacteria;p__Actinobacteriota;c__Coriobacteriia;o__Coriobacteriales;f__Eggerthellaceae;g__Adlercreutzia;s__Adlercreutzia celatus_A	TRUE	FALSE	NA	FALSE
MGYG000062517	NA	NA	UHGG_v2	MAG	Canada	North America	Homo sapiens	2670125	81203	97.58	0	96.67	0.72	d__Bacteria;p__Actinobacteriota;c__Coriobacteriia;o__Coriobacteriales;f__Eggerthellaceae;g__Adlercreutzia;s__Adlercreutzia celatus_A	TRUE	FALSE	NA	FALSE
MGYG000065661	NA	NA	UHGG_v2	MAG	Spain	Europe	Homo sapiens	2234281	9350	86.3	0.88	81.09	2.56	d__Bacteria;p__Actinobacteriota;c__Coriobacteriia;o__Coriobacteriales;f__Eggerthellaceae;g__Adlercreutzia;s__Adlercreutzia celatus_A	FALSE	FALSE	NA	FALSE
MGYG000066056	NA	NA	UHGG_v2	MAG	Kazakhstan	Asia	Homo sapiens	2602144	45853	98.79	0.81	99.04	3.68	d__Bacteria;p__Actinobacteriota;c__Coriobacteriia;o__Coriobacteriales;f__Eggerthellaceae;g__Adlercreutzia;s__Adlercreutzia equolifaciens	TRUE	FALSE	NA	TRUE
MGYG000067395	NA	NA	UHGG_v2	MAG	United States	North America	Homo sapiens	2444514	6038	87.84	1.82	82.54	1.55	d__Bacteria;p__Actinobacteriota;c__Coriobacteriia;o__Coriobacteriales;f__Eggerthellaceae;g__Adlercreutzia;s__Adlercreutzia equolifaciens	FALSE	FALSE	NA	FALSE
MGYG000070014	NA	NA	UHGG_v2	MAG	Canada	North America	Homo sapiens	2287457	7329	91.77	3.09	87.02	1.39	d__Bacteria;p__Actinobacteriota;c__Coriobacteriia;o__Coriobacteriales;f__Eggerthellaceae;g__Adlercreutzia;s__Adlercreutzia celatus_A	TRUE	FALSE	NA	FALSE
MGYG000072685	NA	NA	UHGG_v2	MAG	Austria	Europe	Homo sapiens	2349183	25343	97.42	0.81	88.5	1.34	d__Bacteria;p__Actinobacteriota;c__Coriobacteriia;o__Coriobacteriales;f__Eggerthellaceae;g__Adlercreutzia;s__Adlercreutzia celatus_A	TRUE	FALSE	NA	FALSE
MGYG000073743	NA	NA	UHGG_v2	MAG	Spain	Europe	Homo sapiens	2268509	89074	86.29	1.53	85.62	2.14	d__Bacteria;p__Actinobacteriota;c__Coriobacteriia;o__Coriobacteriales;f__Eggerthellaceae;g__Adlercreutzia;s__Adlercreutzia celatus_A	TRUE	FALSE	NA	FALSE
MGYG000075978	NA	NA	UHGG_v2	MAG	Spain	Europe	Homo sapiens	2123864	13329	83.6	0.07	81.63	0.72	d__Bacteria;p__Actinobacteriota;c__Coriobacteriia;o__Coriobacteriales;f__Eggerthellaceae;g__Adlercreutzia;s__Adlercreutzia equolifaciens	TRUE	FALSE	NA	FALSE
MGYG000082178	NA	NA	UHGG_v2	MAG	China	Asia	Homo sapiens	2460276	8723	87.83	0.81	85.39	0.84	d__Bacteria;p__Actinobacteriota;c__Coriobacteriia;o__Coriobacteriales;f__Eggerthellaceae;g__Adlercreutzia;s__Adlercreutzia equolifaciens	TRUE	FALSE	NA	TRUE
MGYG000084960	NA	NA	UHGG_v2	MAG	Spain	Europe	Homo sapiens	2325373	26153	95.16	0.07	91.45	0.99	d__Bacteria;p__Actinobacteriota;c__Coriobacteriia;o__Coriobacteriales;f__Eggerthellaceae;g__Adlercreutzia;s__Adlercreutzia equolifaciens	TRUE	FALSE	NA	FALSE
MGYG000087282	NA	NA	UHGG_v2	MAG	Netherlands	Europe	Homo sapiens	2205095	109223	87.9	0	84.9	0.74	d__Bacteria;p__Actinobacteriota;c__Coriobacteriia;o__Coriobacteriales;f__Eggerthellaceae;g__Adlercreutzia;s__Adlercreutzia celatus_A	TRUE	FALSE	NA	FALSE
MGYG000091339	NA	NA	UHGG_v2	MAG	Austria	Europe	Homo sapiens	2260090	8896	90.59	3.83	84.49	0.54	d__Bacteria;p__Actinobacteriota;c__Coriobacteriia;o__Coriobacteriales;f__Eggerthellaceae;g__Adlercreutzia;s__Adlercreutzia celatus_A	FALSE	FALSE	NA	FALSE
MGYG000091960	NA	NA	UHGG_v2	MAG	Denmark	Europe	Homo sapiens	2205241	9973	85.15	3.96	87.66	1.83	d__Bacteria;p__Actinobacteriota;c__Coriobacteriia;o__Coriobacteriales;f__Eggerthellaceae;g__Adlercreutzia;s__Adlercreutzia celatus_A	TRUE	FALSE	NA	FALSE
MGYG000095904	NA	NA	UHGG_v2	MAG	China	Asia	Homo sapiens	2401893	9553	81.59	1.08	80.95	3.27	d__Bacteria;p__Actinobacteriota;c__Coriobacteriia;o__Coriobacteriales;f__Eggerthellaceae;g__Adlercreutzia;s__Adlercreutzia equolifaciens	TRUE	FALSE	NA	TRUE
MGYG000096506	NA	NA	UHGG_v2	MAG	China	Asia	Homo sapiens	2506561	66842	98.46	1.77	95.59	0.13	d__Bacteria;p__Actinobacteriota;c__Coriobacteriia;o__Coriobacteriales;f__Eggerthellaceae;g__Adlercreutzia;s__Adlercreutzia equolifaciens	TRUE	FALSE	NA	TRUE
MGYG000107138	NA	NA	UHGG_v2	MAG	United Kingdom	Europe	Homo sapiens	2459328	15268	92.28	0.81	94.06	1.49	d__Bacteria;p__Actinobacteriota;c__Coriobacteriia;o__Coriobacteriales;f__Eggerthellaceae;g__Adlercreutzia;s__Adlercreutzia celatus_A	TRUE	FALSE	NA	FALSE
MGYG000107923	NA	NA	UHGG_v2	MAG	Austria	Europe	Homo sapiens	2625288	11714	96.36	1.21	96.42	0.2	d__Bacteria;p__Actinobacteriota;c__Coriobacteriia;o__Coriobacteriales;f__Eggerthellaceae;g__Adlercreutzia;s__Adlercreutzia celatus_A	TRUE	FALSE	NA	FALSE
MGYG000107988	NA	NA	UHGG_v2	MAG	Austria	Europe	Homo sapiens	2444784	19341	91.23	4.44	90.65	0.44	d__Bacteria;p__Actinobacteriota;c__Coriobacteriia;o__Coriobacteriales;f__Eggerthellaceae;g__Adlercreutzia;s__Adlercreutzia celatus_A	TRUE	FALSE	NA	FALSE
MGYG000112200	NA	NA	UHGG_v2	MAG	France	Europe	Homo sapiens	2713723	23700	98.99	0.07	94.96	2.74	d__Bacteria;p__Actinobacteriota;c__Coriobacteriia;o__Coriobacteriales;f__Eggerthellaceae;g__Adlercreutzia;s__Adlercreutzia celatus_A	TRUE	FALSE	NA	FALSE
MGYG000115793	NA	NA	UHGG_v2	MAG	United States	North America	Homo sapiens	2425902	12134	91.41	0.08	86.08	1.24	d__Bacteria;p__Actinobacteriota;c__Coriobacteriia;o__Coriobacteriales;f__Eggerthellaceae;g__Adlercreutzia;s__Adlercreutzia celatus_A	TRUE	FALSE	NA	FALSE
MGYG000121696	NA	NA	UHGG_v2	MAG	Austria	Europe	Homo sapiens	2379404	19924	92.74	0.4	90.86	0.9	d__Bacteria;p__Actinobacteriota;c__Coriobacteriia;o__Coriobacteriales;f__Eggerthellaceae;g__Adlercreutzia;s__Adlercreutzia celatus_A	TRUE	FALSE	NA	FALSE
MGYG000123661	NA	NA	UHGG_v2	MAG	China	Asia	Homo sapiens	2489907	101684	97.58	0	89.42	0.28	d__Bacteria;p__Actinobacteriota;c__Coriobacteriia;o__Coriobacteriales;f__Eggerthellaceae;g__Adlercreutzia;s__Adlercreutzia equolifaciens	TRUE	FALSE	NA	TRUE
MGYG000124516	NA	NA	UHGG_v2	MAG	Austria	Europe	Homo sapiens	2458825	62349	98.39	0	93.92	0.08	d__Bacteria;p__Actinobacteriota;c__Coriobacteriia;o__Coriobacteriales;f__Eggerthellaceae;g__Adlercreutzia;s__Adlercreutzia celatus_A	TRUE	FALSE	NA	FALSE
MGYG000125545	NA	NA	UHGG_v2	MAG	Mongolia	Asia	Homo sapiens	2460618	10639	93.59	1.73	90.81	2.05	d__Bacteria;p__Actinobacteriota;c__Coriobacteriia;o__Coriobacteriales;f__Eggerthellaceae;g__Adlercreutzia;s__Adlercreutzia equolifaciens	TRUE	FALSE	NA	TRUE
MGYG000132293	NA	NA	UHGG_v2	MAG	Austria	Europe	Homo sapiens	2533238	87965	100	0	99.99	0.31	d__Bacteria;p__Actinobacteriota;c__Coriobacteriia;o__Coriobacteriales;f__Eggerthellaceae;g__Adlercreutzia;s__Adlercreutzia celatus_A	TRUE	FALSE	NA	FALSE
MGYG000132762	NA	NA	UHGG_v2	MAG	China	Asia	Homo sapiens	2571630	44407	97.58	0	91.86	0.28	d__Bacteria;p__Actinobacteriota;c__Coriobacteriia;o__Coriobacteriales;f__Eggerthellaceae;g__Adlercreutzia;s__Adlercreutzia equolifaciens	TRUE	FALSE	NA	TRUE
MGYG000133263	NA	NA	UHGG_v2	MAG	Austria	Europe	Homo sapiens	2523694	15698	94.26	3.78	91.7	3.02	d__Bacteria;p__Actinobacteriota;c__Coriobacteriia;o__Coriobacteriales;f__Eggerthellaceae;g__Adlercreutzia;s__Adlercreutzia celatus_A	TRUE	FALSE	NA	FALSE
MGYG000134655	NA	NA	UHGG_v2	MAG	Mongolia	Asia	Homo sapiens	2510135	7307	87.63	0.92	86.23	1.59	d__Bacteria;p__Actinobacteriota;c__Coriobacteriia;o__Coriobacteriales;f__Eggerthellaceae;g__Adlercreutzia;s__Adlercreutzia equolifaciens	TRUE	FALSE	NA	TRUE
MGYG000134986	NA	NA	UHGG_v2	MAG	China	Asia	Homo sapiens	2612950	10237	87.71	0.16	86.6	3.56	d__Bacteria;p__Actinobacteriota;c__Coriobacteriia;o__Coriobacteriales;f__Eggerthellaceae;g__Adlercreutzia;s__Adlercreutzia equolifaciens	TRUE	FALSE	NA	TRUE
MGYG000136236	NA	NA	UHGG_v2	MAG	Austria	Europe	Homo sapiens	2225854	15795	86.69	0	82.62	2.97	d__Bacteria;p__Actinobacteriota;c__Coriobacteriia;o__Coriobacteriales;f__Eggerthellaceae;g__Adlercreutzia;s__Adlercreutzia celatus_A	FALSE	FALSE	NA	FALSE
MGYG000137194	NA	NA	UHGG_v2	MAG	Austria	Europe	Homo sapiens	2280566	7942	83.17	0.81	81.45	1.19	d__Bacteria;p__Actinobacteriota;c__Coriobacteriia;o__Coriobacteriales;f__Eggerthellaceae;g__Adlercreutzia;s__Adlercreutzia equolifaciens	TRUE	FALSE	NA	FALSE
MGYG000137724	NA	NA	UHGG_v2	MAG	China	Asia	Homo sapiens	2419486	7279	85.7	3.23	82.74	2.49	d__Bacteria;p__Actinobacteriota;c__Coriobacteriia;o__Coriobacteriales;f__Eggerthellaceae;g__Adlercreutzia;s__Adlercreutzia equolifaciens	TRUE	FALSE	NA	TRUE
MGYG000140808	NA	NA	UHGG_v2	MAG	China	Asia	Homo sapiens	2663037	7466	90.11	0	87.22	1.34	d__Bacteria;p__Actinobacteriota;c__Coriobacteriia;o__Coriobacteriales;f__Eggerthellaceae;g__Adlercreutzia;s__Adlercreutzia equolifaciens	FALSE	FALSE	NA	TRUE
MGYG000141626	NA	NA	UHGG_v2	MAG	Germany	Europe	Homo sapiens	2582730	37713	91.67	2.96	91.94	4.13	d__Bacteria;p__Actinobacteriota;c__Coriobacteriia;o__Coriobacteriales;f__Eggerthellaceae;g__Adlercreutzia;s__Adlercreutzia celatus_A	TRUE	FALSE	NA	FALSE
MGYG000142272	NA	NA	UHGG_v2	MAG	Spain	Europe	Homo sapiens	2367007	50506	92.74	0	87.34	0.55	d__Bacteria;p__Actinobacteriota;c__Coriobacteriia;o__Coriobacteriales;f__Eggerthellaceae;g__Adlercreutzia;s__Adlercreutzia celatus_A	FALSE	FALSE	NA	FALSE
MGYG000144083	NA	NA	UHGG_v2	MAG	China	Asia	Homo sapiens	2283990	7092	81.75	2.96	82.5	3.69	d__Bacteria;p__Actinobacteriota;c__Coriobacteriia;o__Coriobacteriales;f__Eggerthellaceae;g__Adlercreutzia;s__Adlercreutzia equolifaciens	FALSE	FALSE	NA	FALSE
MGYG000144498	NA	NA	UHGG_v2	MAG	United States	North America	Homo sapiens	2764061	72435	98.48	0.93	96.64	0.64	d__Bacteria;p__Actinobacteriota;c__Coriobacteriia;o__Coriobacteriales;f__Eggerthellaceae;g__Adlercreutzia;s__Adlercreutzia celatus_A	TRUE	FALSE	NA	FALSE
MGYG000146735	NA	NA	UHGG_v2	MAG	Spain	Europe	Homo sapiens	2608361	45379	95.97	0.81	98.69	0.85	d__Bacteria;p__Actinobacteriota;c__Coriobacteriia;o__Coriobacteriales;f__Eggerthellaceae;g__Adlercreutzia;s__Adlercreutzia celatus_A	TRUE	FALSE	NA	FALSE
MGYG000147783	NA	NA	UHGG_v2	MAG	China	Asia	Homo sapiens	2568685	41887	95.97	1.08	93.4	0.82	d__Bacteria;p__Actinobacteriota;c__Coriobacteriia;o__Coriobacteriales;f__Eggerthellaceae;g__Adlercreutzia;s__Adlercreutzia equolifaciens	TRUE	FALSE	NA	TRUE
MGYG000149235	NA	NA	UHGG_v2	MAG	Austria	Europe	Homo sapiens	2358848	56527	88.71	0.81	82.17	0.63	d__Bacteria;p__Actinobacteriota;c__Coriobacteriia;o__Coriobacteriales;f__Eggerthellaceae;g__Adlercreutzia;s__Adlercreutzia celatus_A	TRUE	FALSE	NA	FALSE
MGYG000149630	NA	NA	UHGG_v2	MAG	Austria	Europe	Homo sapiens	2386197	8608	86.17	0.92	86.86	1.1	d__Bacteria;p__Actinobacteriota;c__Coriobacteriia;o__Coriobacteriales;f__Eggerthellaceae;g__Adlercreutzia;s__Adlercreutzia celatus_A	FALSE	FALSE	NA	FALSE
MGYG000150330	NA	NA	UHGG_v2	MAG	Austria	Europe	Homo sapiens	2436780	43461	96.77	0	92.37	0.28	d__Bacteria;p__Actinobacteriota;c__Coriobacteriia;o__Coriobacteriales;f__Eggerthellaceae;g__Adlercreutzia;s__Adlercreutzia celatus_A	TRUE	FALSE	NA	FALSE
MGYG000152534	NA	NA	UHGG_v2	MAG	Fiji	Oceania	Homo sapiens	2423506	6531	88.94	3.52	86.71	3.82	d__Bacteria;p__Actinobacteriota;c__Coriobacteriia;o__Coriobacteriales;f__Eggerthellaceae;g__Adlercreutzia;s__Adlercreutzia equolifaciens	TRUE	FALSE	NA	TRUE
MGYG000154092	NA	NA	UHGG_v2	MAG	Austria	Europe	Homo sapiens	2379297	7975	81.33	0	80.45	2.31	d__Bacteria;p__Actinobacteriota;c__Coriobacteriia;o__Coriobacteriales;f__Eggerthellaceae;g__Adlercreutzia;s__Adlercreutzia celatus_A	TRUE	FALSE	NA	FALSE
MGYG000160907	NA	NA	UHGG_v2	MAG	Germany	Europe	Homo sapiens	2408413	14772	90.53	2.35	87.31	4.07	d__Bacteria;p__Actinobacteriota;c__Coriobacteriia;o__Coriobacteriales;f__Eggerthellaceae;g__Adlercreutzia;s__Adlercreutzia celatus_A	TRUE	FALSE	NA	FALSE
MGYG000161021	NA	NA	UHGG_v2	MAG	China	Asia	Homo sapiens	2451826	17077	89.11	2.08	89.45	2.07	d__Bacteria;p__Actinobacteriota;c__Coriobacteriia;o__Coriobacteriales;f__Eggerthellaceae;g__Adlercreutzia;s__Adlercreutzia equolifaciens	TRUE	FALSE	NA	FALSE
MGYG000162202	NA	NA	UHGG_v2	MAG	Germany	Europe	Homo sapiens	2357499	6517	83.99	4.15	85.17	3.29	d__Bacteria;p__Actinobacteriota;c__Coriobacteriia;o__Coriobacteriales;f__Eggerthellaceae;g__Adlercreutzia;s__Adlercreutzia equolifaciens	FALSE	FALSE	NA	TRUE
MGYG000167880	NA	NA	UHGG_v2	MAG	Spain	Europe	Homo sapiens	2188752	8252	80.29	0.88	80.98	2.31	d__Bacteria;p__Actinobacteriota;c__Coriobacteriia;o__Coriobacteriales;f__Eggerthellaceae;g__Adlercreutzia;s__Adlercreutzia celatus_A	FALSE	FALSE	NA	FALSE
MGYG000171534	NA	NA	UHGG_v2	MAG	Austria	Europe	Homo sapiens	2300069	23080	84.86	2.58	81.74	3.06	d__Bacteria;p__Actinobacteriota;c__Coriobacteriia;o__Coriobacteriales;f__Eggerthellaceae;g__Adlercreutzia;s__Adlercreutzia celatus_A	TRUE	FALSE	NA	FALSE
MGYG000172855	NA	NA	UHGG_v2	MAG	United States	North America	Homo sapiens	2588456	17808	97.89	1.61	95.85	0.63	d__Bacteria;p__Actinobacteriota;c__Coriobacteriia;o__Coriobacteriales;f__Eggerthellaceae;g__Adlercreutzia;s__Adlercreutzia celatus_A	TRUE	FALSE	NA	TRUE
MGYG000174936	NA	NA	UHGG_v2	MAG	Austria	Europe	Homo sapiens	2534334	16543	90.93	0.16	92.83	0.45	d__Bacteria;p__Actinobacteriota;c__Coriobacteriia;o__Coriobacteriales;f__Eggerthellaceae;g__Adlercreutzia;s__Adlercreutzia equolifaciens	TRUE	FALSE	NA	FALSE
MGYG000176472	NA	NA	UHGG_v2	MAG	Austria	Europe	Homo sapiens	2502835	7241	87.77	1.61	88.15	0.52	d__Bacteria;p__Actinobacteriota;c__Coriobacteriia;o__Coriobacteriales;f__Eggerthellaceae;g__Adlercreutzia;s__Adlercreutzia celatus_A	TRUE	FALSE	NA	FALSE
MGYG000176710	NA	NA	UHGG_v2	MAG	Austria	Europe	Homo sapiens	2416413	9075	80.88	1.88	82.03	3.27	d__Bacteria;p__Actinobacteriota;c__Coriobacteriia;o__Coriobacteriales;f__Eggerthellaceae;g__Adlercreutzia;s__Adlercreutzia celatus_A	TRUE	FALSE	NA	FALSE
MGYG000177285	NA	NA	UHGG_v2	MAG	United Kingdom	Europe	Homo sapiens	2411565	19109	91.84	1.84	89.68	2.14	d__Bacteria;p__Actinobacteriota;c__Coriobacteriia;o__Coriobacteriales;f__Eggerthellaceae;g__Adlercreutzia;s__Adlercreutzia celatus_A	TRUE	FALSE	NA	FALSE
MGYG000179418	NA	NA	UHGG_v2	MAG	Austria	Europe	Homo sapiens	2525978	84047	94.06	0	92.37	0.25	d__Bacteria;p__Actinobacteriota;c__Coriobacteriia;o__Coriobacteriales;f__Eggerthellaceae;g__Adlercreutzia;s__Adlercreutzia celatus_A	TRUE	FALSE	NA	FALSE
MGYG000180489	NA	NA	UHGG_v2	MAG	Austria	Europe	Homo sapiens	2350210	9637	84.54	2.82	84.12	1.06	d__Bacteria;p__Actinobacteriota;c__Coriobacteriia;o__Coriobacteriales;f__Eggerthellaceae;g__Adlercreutzia;s__Adlercreutzia celatus_A	TRUE	FALSE	NA	FALSE
MGYG000181441	NA	NA	UHGG_v2	MAG	Sweden	Europe	Homo sapiens	2210249	10337	75.42	1.81	80.96	0.65	d__Bacteria;p__Actinobacteriota;c__Coriobacteriia;o__Coriobacteriales;f__Eggerthellaceae;g__Adlercreutzia;s__Adlercreutzia celatus_A	TRUE	FALSE	NA	FALSE
MGYG000183110	NA	NA	UHGG_v2	MAG	Denmark	Europe	Homo sapiens	2387988	7385	88.78	3.09	86.25	0.15	d__Bacteria;p__Actinobacteriota;c__Coriobacteriia;o__Coriobacteriales;f__Eggerthellaceae;g__Adlercreutzia;s__Adlercreutzia equolifaciens	TRUE	FALSE	NA	FALSE
MGYG000186974	NA	NA	UHGG_v2	MAG	Austria	Europe	Homo sapiens	2383819	28042	97.58	1.32	90.91	1.89	d__Bacteria;p__Actinobacteriota;c__Coriobacteriia;o__Coriobacteriales;f__Eggerthellaceae;g__Adlercreutzia;s__Adlercreutzia celatus_A	TRUE	FALSE	NA	FALSE
MGYG000187137	NA	NA	UHGG_v2	MAG	Netherlands	Europe	Homo sapiens	2407557	10963	93.45	3.63	87.41	1.15	d__Bacteria;p__Actinobacteriota;c__Coriobacteriia;o__Coriobacteriales;f__Eggerthellaceae;g__Adlercreutzia;s__Adlercreutzia celatus_A	FALSE	FALSE	NA	FALSE
MGYG000188202	NA	NA	UHGG_v2	MAG	United States	North America	Homo sapiens	2675999	50462	97.74	1.61	96.26	1.34	d__Bacteria;p__Actinobacteriota;c__Coriobacteriia;o__Coriobacteriales;f__Eggerthellaceae;g__Adlercreutzia;s__Adlercreutzia celatus_A	FALSE	FALSE	NA	FALSE
MGYG000194594	NA	NA	UHGG_v2	MAG	China	Asia	Homo sapiens	2492052	15468	88.66	0.81	87.4	1.37	d__Bacteria;p__Actinobacteriota;c__Coriobacteriia;o__Coriobacteriales;f__Eggerthellaceae;g__Adlercreutzia;s__Adlercreutzia equolifaciens	TRUE	FALSE	NA	FALSE
MGYG000197899	NA	NA	UHGG_v2	MAG	Sweden	Europe	Homo sapiens	2283357	5848	77.84	0.4	81.49	1.63	d__Bacteria;p__Actinobacteriota;c__Coriobacteriia;o__Coriobacteriales;f__Eggerthellaceae;g__Adlercreutzia;s__Adlercreutzia celatus_A	FALSE	FALSE	NA	FALSE
MGYG000197928	NA	NA	UHGG_v2	MAG	Austria	Europe	Homo sapiens	2372224	19807	90.06	2.77	86.31	2.63	d__Bacteria;p__Actinobacteriota;c__Coriobacteriia;o__Coriobacteriales;f__Eggerthellaceae;g__Adlercreutzia;s__Adlercreutzia celatus_A	FALSE	FALSE	NA	FALSE
MGYG000199374	NA	NA	UHGG_v2	MAG	Austria	Europe	Homo sapiens	2335281	43749	88.31	0	81.04	0.22	d__Bacteria;p__Actinobacteriota;c__Coriobacteriia;o__Coriobacteriales;f__Eggerthellaceae;g__Adlercreutzia;s__Adlercreutzia celatus_A	TRUE	FALSE	NA	FALSE
MGYG000200427	NA	NA	UHGG_v2	MAG	Fiji	Oceania	Homo sapiens	2463686	10047	90.11	0.5	89.97	2.89	d__Bacteria;p__Actinobacteriota;c__Coriobacteriia;o__Coriobacteriales;f__Eggerthellaceae;g__Adlercreutzia;s__Adlercreutzia equolifaciens	TRUE	FALSE	NA	TRUE
MGYG000206403	NA	NA	UHGG_v2	MAG	Austria	Europe	Homo sapiens	2371338	11486	84.58	0	81.46	1.3	d__Bacteria;p__Actinobacteriota;c__Coriobacteriia;o__Coriobacteriales;f__Eggerthellaceae;g__Adlercreutzia;s__Adlercreutzia celatus_A	FALSE	FALSE	NA	FALSE
MGYG000206592	NA	NA	UHGG_v2	MAG	Netherlands	Europe	Homo sapiens	2430220	10450	89.3	3.05	85.26	4.9	d__Bacteria;p__Actinobacteriota;c__Coriobacteriia;o__Coriobacteriales;f__Eggerthellaceae;g__Adlercreutzia;s__Adlercreutzia celatus_A	FALSE	FALSE	NA	FALSE
MGYG000208363	NA	NA	UHGG_v2	MAG	Austria	Europe	Homo sapiens	2583424	12021	90.87	1.73	89.66	1.83	d__Bacteria;p__Actinobacteriota;c__Coriobacteriia;o__Coriobacteriales;f__Eggerthellaceae;g__Adlercreutzia;s__Adlercreutzia celatus_A	TRUE	FALSE	NA	FALSE
MGYG000209627	NA	NA	UHGG_v2	MAG	Austria	Europe	Homo sapiens	2277648	26689	88.87	2.29	90.68	1.61	d__Bacteria;p__Actinobacteriota;c__Coriobacteriia;o__Coriobacteriales;f__Eggerthellaceae;g__Adlercreutzia;s__Adlercreutzia celatus_A	FALSE	FALSE	NA	FALSE
MGYG000214551	NA	NA	UHGG_v2	MAG	Austria	Europe	Homo sapiens	2474354	59583	89.52	1.55	86.64	2.44	d__Bacteria;p__Actinobacteriota;c__Coriobacteriia;o__Coriobacteriales;f__Eggerthellaceae;g__Adlercreutzia;s__Adlercreutzia celatus_A	FALSE	FALSE	NA	FALSE
MGYG000215673	NA	NA	UHGG_v2	MAG	Austria	Europe	Homo sapiens	2345628	13120	87.97	0	86.64	0.42	d__Bacteria;p__Actinobacteriota;c__Coriobacteriia;o__Coriobacteriales;f__Eggerthellaceae;g__Adlercreutzia;s__Adlercreutzia celatus_A	TRUE	FALSE	NA	FALSE
MGYG000217540	NA	NA	UHGG_v2	MAG	Mongolia	Asia	Homo sapiens	2472804	22266	97.98	0	99.56	0.22	d__Bacteria;p__Actinobacteriota;c__Coriobacteriia;o__Coriobacteriales;f__Eggerthellaceae;g__Adlercreutzia;s__Adlercreutzia equolifaciens	TRUE	FALSE	NA	FALSE
MGYG000219951	NA	NA	UHGG_v2	MAG	Austria	Europe	Homo sapiens	2546303	64514	91.13	0	85.6	1.34	d__Bacteria;p__Actinobacteriota;c__Coriobacteriia;o__Coriobacteriales;f__Eggerthellaceae;g__Adlercreutzia;s__Adlercreutzia equolifaciens	FALSE	FALSE	NA	FALSE
MGYG000220359	NA	NA	UHGG_v2	MAG	Austria	Europe	Homo sapiens	2297282	13104	75.34	0.81	83.02	0.66	d__Bacteria;p__Actinobacteriota;c__Coriobacteriia;o__Coriobacteriales;f__Eggerthellaceae;g__Adlercreutzia;s__Adlercreutzia celatus_A	TRUE	FALSE	NA	FALSE
MGYG000221000	NA	NA	UHGG_v2	MAG	Austria	Europe	Homo sapiens	2354449	21124	91.86	1.08	85.3	0.27	d__Bacteria;p__Actinobacteriota;c__Coriobacteriia;o__Coriobacteriales;f__Eggerthellaceae;g__Adlercreutzia;s__Adlercreutzia celatus_A	TRUE	FALSE	NA	FALSE
MGYG000224111	NA	NA	UHGG_v2	MAG	United States	North America	Homo sapiens	2348806	9368	86.04	3.45	81.65	3.67	d__Bacteria;p__Actinobacteriota;c__Coriobacteriia;o__Coriobacteriales;f__Eggerthellaceae;g__Adlercreutzia;s__Adlercreutzia celatus_A	FALSE	FALSE	NA	FALSE
MGYG000225128	NA	NA	UHGG_v2	MAG	Germany	Europe	Homo sapiens	2563161	20827	89.35	1.73	94.26	3.71	d__Bacteria;p__Actinobacteriota;c__Coriobacteriia;o__Coriobacteriales;f__Eggerthellaceae;g__Adlercreutzia;s__Adlercreutzia celatus_A	TRUE	FALSE	NA	FALSE
MGYG000228296	NA	NA	UHGG_v2	MAG	United States	North America	Homo sapiens	2330347	7716	85.05	1.21	84.76	1.65	d__Bacteria;p__Actinobacteriota;c__Coriobacteriia;o__Coriobacteriales;f__Eggerthellaceae;g__Adlercreutzia;s__Adlercreutzia equolifaciens	TRUE	FALSE	NA	FALSE
MGYG000230854	NA	NA	UHGG_v2	MAG	Austria	Europe	Homo sapiens	2280472	10334	85.1	2.49	83.93	3.97	d__Bacteria;p__Actinobacteriota;c__Coriobacteriia;o__Coriobacteriales;f__Eggerthellaceae;g__Adlercreutzia;s__Adlercreutzia celatus_A	FALSE	FALSE	NA	FALSE
MGYG000232433	NA	NA	UHGG_v2	MAG	Denmark	Europe	Homo sapiens	2477091	11014	87.37	3.97	85.89	2.24	d__Bacteria;p__Actinobacteriota;c__Coriobacteriia;o__Coriobacteriales;f__Eggerthellaceae;g__Adlercreutzia;s__Adlercreutzia celatus_A	TRUE	FALSE	NA	FALSE
MGYG000235688	NA	NA	UHGG_v2	MAG	Spain	Europe	Homo sapiens	2496788	59091	95.97	0	93.92	1.69	d__Bacteria;p__Actinobacteriota;c__Coriobacteriia;o__Coriobacteriales;f__Eggerthellaceae;g__Adlercreutzia;s__Adlercreutzia celatus_A	TRUE	FALSE	NA	FALSE
MGYG000235892	NA	NA	UHGG_v2	MAG	Austria	Europe	Homo sapiens	2185698	9066	81.13	0.16	80.48	1.69	d__Bacteria;p__Actinobacteriota;c__Coriobacteriia;o__Coriobacteriales;f__Eggerthellaceae;g__Adlercreutzia;s__Adlercreutzia equolifaciens	TRUE	FALSE	NA	FALSE
MGYG000237278	NA	NA	UHGG_v2	MAG	Spain	Europe	Homo sapiens	2530411	15783	95.16	3.77	90.39	3.24	d__Bacteria;p__Actinobacteriota;c__Coriobacteriia;o__Coriobacteriales;f__Eggerthellaceae;g__Adlercreutzia;s__Adlercreutzia celatus_A	TRUE	FALSE	NA	FALSE
MGYG000245042	NA	NA	UHGG_v2	MAG	Germany	Europe	Homo sapiens	2579320	14776	89.35	0.92	89.88	1.29	d__Bacteria;p__Actinobacteriota;c__Coriobacteriia;o__Coriobacteriales;f__Eggerthellaceae;g__Adlercreutzia;s__Adlercreutzia celatus_A	TRUE	FALSE	NA	FALSE
MGYG000245104	NA	NA	UHGG_v2	MAG	Austria	Europe	Homo sapiens	2437208	10810	90.34	1.88	86.78	3.44	d__Bacteria;p__Actinobacteriota;c__Coriobacteriia;o__Coriobacteriales;f__Eggerthellaceae;g__Adlercreutzia;s__Adlercreutzia celatus_A	FALSE	FALSE	NA	FALSE
MGYG000248542	NA	NA	UHGG_v2	MAG	Germany	Europe	Homo sapiens	2608431	41243	95.22	1.34	95.15	3.96	d__Bacteria;p__Actinobacteriota;c__Coriobacteriia;o__Coriobacteriales;f__Eggerthellaceae;g__Adlercreutzia;s__Adlercreutzia celatus_A	TRUE	FALSE	NA	FALSE
MGYG000249190	NA	NA	UHGG_v2	MAG	Sweden	Europe	Homo sapiens	2497156	10341	92.24	1.7	85.01	3.66	d__Bacteria;p__Actinobacteriota;c__Coriobacteriia;o__Coriobacteriales;f__Eggerthellaceae;g__Adlercreutzia;s__Adlercreutzia celatus_A	TRUE	FALSE	NA	FALSE
MGYG000262012	NA	NA	UHGG_v2	MAG	Austria	Europe	Homo sapiens	2677629	40639	94.53	3.09	90.58	0.98	d__Bacteria;p__Actinobacteriota;c__Coriobacteriia;o__Coriobacteriales;f__Eggerthellaceae;g__Adlercreutzia;s__Adlercreutzia celatus_A	TRUE	FALSE	NA	FALSE
MGYG000266689	NA	NA	UHGG_v2	MAG	Austria	Europe	Homo sapiens	2340346	26801	77.28	0.27	83.17	0.96	d__Bacteria;p__Actinobacteriota;c__Coriobacteriia;o__Coriobacteriales;f__Eggerthellaceae;g__Adlercreutzia;s__Adlercreutzia celatus_A	TRUE	FALSE	NA	FALSE
MGYG000277795	NA	NA	UHGG_v2	MAG	Austria	Europe	Homo sapiens	2316243	8543	84.76	2.7	83.88	1.63	d__Bacteria;p__Actinobacteriota;c__Coriobacteriia;o__Coriobacteriales;f__Eggerthellaceae;g__Adlercreutzia;s__Adlercreutzia celatus_A	FALSE	FALSE	NA	FALSE
MGYG000284421	NA	NA	UHGG_v2	MAG	China	Asia	Homo sapiens	2501675	81480	92.74	0	91.68	0.47	d__Bacteria;p__Actinobacteriota;c__Coriobacteriia;o__Coriobacteriales;f__Eggerthellaceae;g__Adlercreutzia;s__Adlercreutzia equolifaciens	TRUE	FALSE	NA	FALSE
MGYG000284493	NA	NA	UHGG_v2	MAG	Austria	Europe	Homo sapiens	2507859	12527	98.64	1.88	93.73	3.3	d__Bacteria;p__Actinobacteriota;c__Coriobacteriia;o__Coriobacteriales;f__Eggerthellaceae;g__Adlercreutzia;s__Adlercreutzia celatus_A	FALSE	FALSE	NA	FALSE
MGYG000287348	NA	NA	UHGG_v2	MAG	Austria	Europe	Homo sapiens	2278642	8477	82.33	0.81	81.39	2.21	d__Bacteria;p__Actinobacteriota;c__Coriobacteriia;o__Coriobacteriales;f__Eggerthellaceae;g__Adlercreutzia;s__Adlercreutzia celatus_A	FALSE	FALSE	NA	FALSE
SRS254664	UC1_BHI_P	NA	INSDC	Isolate	United States	North America	Homo sapiens	2673443	86137	100	0.81	99.99	0.23	d__Bacteria;p__Actinobacteriota;c__Coriobacteriia;o__Coriobacteriales;f__Eggerthellaceae;g__Adlercreutzia;s__Adlercreutzia celatus_A	TRUE	FALSE	NA	FALSE
